# Supplementary material for: Exosomal circ-PTPN22 and circ-ADAMTS6 mark T cell exhaustion and neutrophil extracellular traps in Asian intrahepatic cholangiocarcinoma
Source: PubMed Central journal article supplement — Mol Ther Nucleic Acids. 2022 Dec 23;31:151–63. doi: 10.1016/j.omtn.2022.12.012 (PMC9841234; doi:10.1016/j.omtn.2022.12.012), 2022-12-23
Supplement: mmc1.pdf [file mmc1.pdf]

OMTN, Volume 31

## **Supplemental information**

**Exosomal circ-PTPN22 and circ-ADAMTS6 mark**

**T cell exhaustion and neutrophil extracellular**

**traps in Asian intrahepatic cholangiocarcinoma**

**Xuezhu Wang, Guanqun Wang, Zilong Wu, Yucheng Dong, Yue Shi, Fan Yang, Xinyu Chen, Jun Wang, Shunda Du, Haifeng Xu, and Yongchang Zheng**

**Table S1 Clinical data of the Asian ICC patient cohort.**

| <b>Subgroup</b> | <b>ID</b> | <b>Age</b> | <b>Sex</b> | <b>CA199</b> | <b>CA125</b> | <b>Differentiation</b> | <b>TNM</b> | <b>OP date</b> | <b>Lymph node</b> | <b>Recurrence (2021-08)</b> | <b>Metastases (2021-08)</b> | <b>Survival (2021-08)</b> |
|-----------------|-----------|------------|------------|--------------|--------------|------------------------|------------|----------------|-------------------|-----------------------------|-----------------------------|---------------------------|
| 1               | 2534465   | 72         | male       | 13.4         | NA           | NA                     | NA         | 2020/9/11      | none              | none                        | none                        | alive                     |
| 2               | 2537821   | 80         | male       | 66.1         | 20.8         | NA                     | T1N1M0     | 2020/9/18      | metastases        | none                        | none                        | alive                     |
| 2               | 2518780   | 59         | male       | NA           | NA           | NA                     | NA         | 2019/12/2      | none              | none                        | none                        | alive                     |
| 2               | 2287602   | 68         | female     | 2907         | 80           | G1                     | T4N1M1     | 2018/12/14     | none              | NA                          | NA                          | NA                        |
| 2               | 1         | 66         | male       | 1.73         | 6.48         | G2                     | T1bN0M0    | 2020/1/11      | none              | recurrent (2021/4/28)       | intrahepatic and lymph      | alive                     |
| 2               | 2         | 53         | male       | 1592.4       | 8.52         | G3                     | T2N0M0     | 2020/1/16      | metastases        | recurrent (2021/1/13)       | intrahepatic and lung       | alive                     |
| 2               | 5         | 63         | female     | 1988.1       | 1112.68      | G3                     | T3N1M0     | 2020/12/17     | metastases        | recurrent (2021/3/5)        | intrahepatic                | deceased (2021/6/1)       |

|   |         |    |        |        |        |    |         |           |            |                        |                        |                       |
|---|---------|----|--------|--------|--------|----|---------|-----------|------------|------------------------|------------------------|-----------------------|
| 2 | 7       | 51 | male   | 18.15  | 100.81 | G3 | T1bN1M0 | 2021/1/7  | metastases | none                   | none                   | alive                 |
| 3 | 2520263 | 65 | female | 146.9  | 277.5  | Gx | NA      | 2019/1/8  | metastases | recurrent (2019/12/17) | intrahepatic and lymph | deceased (2019/12/26) |
| 3 | 2523247 | 67 | male   | 21.8   | NA     | G3 | T3N0M0  | 2019/1/29 | metastases | NA                     | NA                     | NA                    |
| 3 | 2393116 | 60 | female | 119.5  | NA     | NA | T1N0M0  | 2019/3/15 | none       | none                   | none                   | alive                 |
| 3 | 3       | 74 | male   | 154.41 | 12.86  | G3 | T3N1M0  | 2020/1/18 | none       | NA                     | NA                     | NA                    |
| 3 | 4       | 66 | female | 44.55  | 4.76   | G3 | T1bN0M0 | 2020/1/23 | none       | recurrent (2021/7/7)   | intrahepatic           | alive                 |
| 3 | 6       | 75 | female | 510.11 | 157.05 | G3 | T1bN0M0 | 2020/1/29 | none       | recurrent (2021/3/1)   | intrahepatic           | deceased (2021/6/1)   |

**Table S2 Mean size and concentration of exosomes.**

|          | <b>Mean size of exosomes (nm)</b> | <b>Concentration of exosomes (Particles/mL)</b> |
|----------|-----------------------------------|-------------------------------------------------|
| <b>1</b> | 76.63                             | 5.32E+8                                         |
| <b>2</b> | 80.48                             | 5.02E+8                                         |
| <b>3</b> | 78.44                             | 9.81E+8                                         |
| <b>4</b> | 76.97                             | 7.22E+8                                         |
| <b>5</b> | 79.29                             | 1.23E9                                          |

**Table S3 Raw data of the size of exosomes.**

These data are too big to be presented in this document.

Please find the supplemental file “TableS3.xlsx”.

**Table S4 circRNAs reported by recent publications.**

| <b>circRNA</b> | <b>Host gene</b> | <b>Microarray probe</b> | <b>ID in circBase (hg19)</b> | <b>ID in this study (hg38)</b> |
|----------------|------------------|-------------------------|------------------------------|--------------------------------|
| circ-PTPN22    | PTPN22           | ASCRP3004050            | chr1:114377531-114397671     | chr1-113834909-113855049--     |
| circ-ADAMTS6   | ADAMTS6          | ASCRP3001689            | chr5:64747301-64769779       | chr5-65451474-65473952--       |
| CDR1as         | CDR1             | ASCRP3010297            | chrX:139865339-139866824     | chrX-140783174-140784659-+     |
| circ-0000284   | HIPK3            | ASCRP3002878            | chr11:33307958-33309057      | chr11-33286412-33287511-+      |
| circ_0005230   | DNM3OS           | ASCRP3013585            | chr1:172109619-172113577     | chr1-172140479-172144437--     |
| circRTN4IP1    | RTN4IP1          | ASCRP3013332            | chr6:107031202-107050797     | chr6-106583327-106602922--     |
| circSETD3      | SETD3            | ASCRP3002403            | chr14:99924615-99932150      | chr14-99458278-99465813--      |
| circ_0020256   | NSMCE4A          | ASCRP3009181            | chr10:123718838-123721032    | chr10-121959323-121961517--    |
| circ-CCAC1     | ERBB2            | ASCRP3004665            | chr17:37880978-37882106      | chr17-39724725-39725853-+      |
| circ-LAMP1     | LAMP1            | ASCRP3013337            | chr13:113963957-113964177    | Not captured                   |
| circ0021205    | WEE1             | Not captured            | chr11:9597776-9611313        | Not captured                   |

**Table S5 Primer sequences used for RT-qPCR validation.**

|                     | <b>Forward</b>            | <b>Reverse</b>           |
|---------------------|---------------------------|--------------------------|
| <b>circ-PTPN22</b>  | CCTGTATGGACACCTGAATCATT   | AACACTGTCATCCTCTTGGTAAC  |
| <b>circ-ADAMTS6</b> | ATTGCCACACCACGATAATGC     | TCCACTGTTTAAGAGCCACTTT   |
| <b>GAPDH mRNA</b>   | AGGGCTGCTTTTAACTCTGGT     | CCCCACTTGATTTTGGAGGGA    |
| <b>PTPN22 mRNA</b>  | CCTACAACCTGTGGCTGAGAA     | AATCATCCTCCAGAAGTCCAG    |
| <b>ADAMTS6 mRNA</b> | GCCGTGGTACTTGCCTTGATAATGA | GCTGCTGGAATACTGTTGGTGACA |

**Table S6 Raw data of RT-qPCR results.**

**circ-PTPN22**

| <b>Normal without RNase R</b> | <b>Normal with RNase R</b> | <b>Subgroup2 without RNase R</b> | <b>Subgroup2 with RNase R</b> | <b>Subgroup3 without RNase R</b> | <b>Subgroup3 with RNase R</b> |
|-------------------------------|----------------------------|----------------------------------|-------------------------------|----------------------------------|-------------------------------|
| 0.845106                      | 1.441134                   | 20.05075                         | 25.43529                      | 0.700863                         | 1.344626                      |
| 1.154449                      | 0.29062                    | 13.6552                          | 25.51818                      | 0.534849                         | 1.033261                      |
| 0.946118                      | 0.837579                   | 4.299362                         | 4.770441                      | 1.525517                         | 0.138629                      |
| 1.053882                      | 2.719574                   | 6.426898                         | 7.967475                      | 2.656079                         | 0.202964                      |
| 0.359515                      | 2.368745                   | 3.103428                         | 4.48113                       | 0.944842                         | 1.19594                       |
| 1.640485                      | 0.415846                   | 2.627813                         | 4.450176                      | 1.100489                         | 1.691315                      |
| 1.031182                      | 0.138149                   | 4.12041                          | 5.94958                       |                                  |                               |
| 0.968818                      | 0.144016                   | 6.202233                         | 5.072819                      |                                  |                               |
| 0.557926                      | 0.419908                   |                                  |                               |                                  |                               |
| 1.442074                      | 0.557926                   |                                  |                               |                                  |                               |
| 0.961836                      | 0.51902                    |                                  |                               |                                  |                               |
| 1.03804                       | 0.445613                   |                                  |                               |                                  |                               |
| 1.077575                      | 1.246418                   |                                  |                               |                                  |                               |
| 0.925168                      | 1.246418                   |                                  |                               |                                  |                               |
| 1.191569                      | 1.346145                   |                                  |                               |                                  |                               |
| 1.000147                      | 0.579919                   |                                  |                               |                                  |                               |

**circ-ADAMTS6**

| <b>Normal without RNase R</b> | <b>Normal with RNase R</b> | <b>Subgroup2 without RNase R</b> | <b>Subgroup2 with RNase R</b> | <b>Subgroup3 without RNase R</b> | <b>Subgroup3 with RNase R</b> |
|-------------------------------|----------------------------|----------------------------------|-------------------------------|----------------------------------|-------------------------------|
| 0.943123                      | 1.364224                   | 8.726059                         | 7.969826                      | 1.182231                         | 0.698103                      |
| 1.056877                      | 2.254259                   | 8.801042                         | 9.129387                      | 1.050817                         | 1.445443                      |
| 1.027719                      | 1.453414                   | 6.230922                         | 4.624975                      | 0.077636                         | 0.081495                      |
| 0.972281                      | 1.291856                   | 5.462061                         | 5.615621                      | 0.125248                         | 0.103871                      |
| 0.651353                      | 1.570813                   | 2.523608                         | 2.595477                      | 8.485361                         | 8.603812                      |
| 1.348646                      | 1.386562                   | 1.817002                         | 2.942166                      | 8.310735                         | 6.430701                      |
| 1.058817                      | 0.571352                   | 1.16053                          | 1.468948                      |                                  |                               |
| 0.941121                      | 0.79689                    | 1.783589                         | 2.470466                      |                                  |                               |
| 0.592028                      | 0.418237                   |                                  |                               |                                  |                               |
| 1.407981                      | 0.875565                   |                                  |                               |                                  |                               |
| 0.982673                      | 0.576257                   |                                  |                               |                                  |                               |
| 1.017327                      | 0.832074                   |                                  |                               |                                  |                               |
| 1.006939                      | 1.013943                   |                                  |                               |                                  |                               |
| 0.993076                      | 0.683009                   |                                  |                               |                                  |                               |



**PTPN22 mRNA**

| <b>Normal without RNase R</b> | <b>Normal with RNase R</b> | <b>Subgroup2 without RNase R</b> | <b>Subgroup2 with RNase R</b> | <b>Subgroup3 without RNase R</b> | <b>Subgroup3 with RNase R</b> |
|-------------------------------|----------------------------|----------------------------------|-------------------------------|----------------------------------|-------------------------------|
| 0.768768                      | 0.096706                   | 1.678219                         | 0.340603                      | 0.081923                         | 0.033271                      |
| 1.09308                       | 0.003395                   | 1.431785                         | 0.491162                      | 0.072313                         | 0.029166                      |
| 1.138397                      | 0.058775                   | 5.010523                         | 0.704641                      | 0.404878                         | 0.051294                      |
| 1.006928                      | 0.341501                   | 5.115805                         | 0.771085                      | 0.323635                         | 0.044876                      |
| 0.993066                      | 0.371121                   | 3.740912                         | 0.506486                      | 0.302513                         | 0.138223                      |
| 1.064369                      | 0.926587                   | 2.108741                         | 0.666247                      | 0.15659                          | 0.174956                      |
| 0.999999                      | 0.414659                   | 4.899345                         | 1.720215                      |                                  |                               |
| 1.145082                      | 0.32949                    | 7.074308                         | 1.561128                      |                                  |                               |
| 0.854918                      | 0.295519                   |                                  |                               |                                  |                               |
| 0.543625                      | 0.237907                   |                                  |                               |                                  |                               |
| 1.463722                      | 0.2325                     |                                  |                               |                                  |                               |
| 1.226943                      | 0.019574                   |                                  |                               |                                  |                               |
| 0.776505                      | 0.019574                   |                                  |                               |                                  |                               |
| 0.82507                       | 0.145853                   |                                  |                               |                                  |                               |
| 1.174942                      | 0.142852                   |                                  |                               |                                  |                               |

**ADAMTS6 mRNA**

| <b>Normal without RNase R</b> | <b>Normal with RNase R</b> | <b>Subgroup2 without RNase R</b> | <b>Subgroup2 with RNase R</b> | <b>Subgroup3 without RNase R</b> | <b>Subgroup3 with RNase R</b> |
|-------------------------------|----------------------------|----------------------------------|-------------------------------|----------------------------------|-------------------------------|
| 1.498709                      | 0.632992                   | 2.764976                         | 0.715304                      | 0.963277                         | 0.072094                      |
| 1.468477                      | 0.415847                   | 1.883026                         | 0.700918                      | 0.172662                         | 0.071596                      |
| 0.032463                      | 0.00668                    | 2.06218                          | 1.184411                      | 0.126477                         | 0.050658                      |
| 1.034669                      | 0.079614                   | 1.734079                         | 0.97547                       | 0.190379                         | 0.053547                      |
| 0.965381                      | 0.072251                   | 5.771718                         | 4.196801                      | 0.470508                         | 0.083555                      |
| 1.24454                       | 0.82109                    | 9.503187                         | 1.548238                      | 0.31006                          | 0.532809                      |
| 0.755557                      | 0.380406                   | 4.899345                         | 1.720215                      |                                  |                               |
| 1.243377                      | 0.903985                   | 7.074308                         | 1.561128                      |                                  |                               |
| 0.756623                      | 1.416929                   |                                  |                               |                                  |                               |
| 0.82507                       | 0.145853                   |                                  |                               |                                  |                               |
| 1.174942                      | 0.142852                   |                                  |                               |                                  |                               |
| 0.788371                      | 0.109344                   |                                  |                               |                                  |                               |
| 1.211628                      | 0.157885                   |                                  |                               |                                  |                               |
| 1.139589                      | 0.153589                   |                                  |                               |                                  |                               |
| 0.860392                      | 0.167761                   |                                  |                               |                                  |                               |

**Table S7 Primer sequences used PCR analysis.**

|                           | <b>Forward</b>            | <b>Reverse</b>           |
|---------------------------|---------------------------|--------------------------|
| <b>circ-PTPN22 primer</b> | TACCAAAAAGCAACTGCTCCA     | ACAACGTACATCCCAGATGAGC   |
| <b>circ-ADAMTS6</b>       | ATTGCCACCACGATAATGC       | TCCACTGTTTAAGAGCCACTTT   |
| <b>PTPN22 mRNA</b>        | CCTACAACGTGGCTGAGAA       | AATCATCCTCCAGAAGTCCAG    |
| <b>ADAMTS6 mRNA</b>       | GCCGTGGTACTTGCCTTGATAATGA | GCTGCTGGAATACTGTTGGTGACA |

Fig. S1

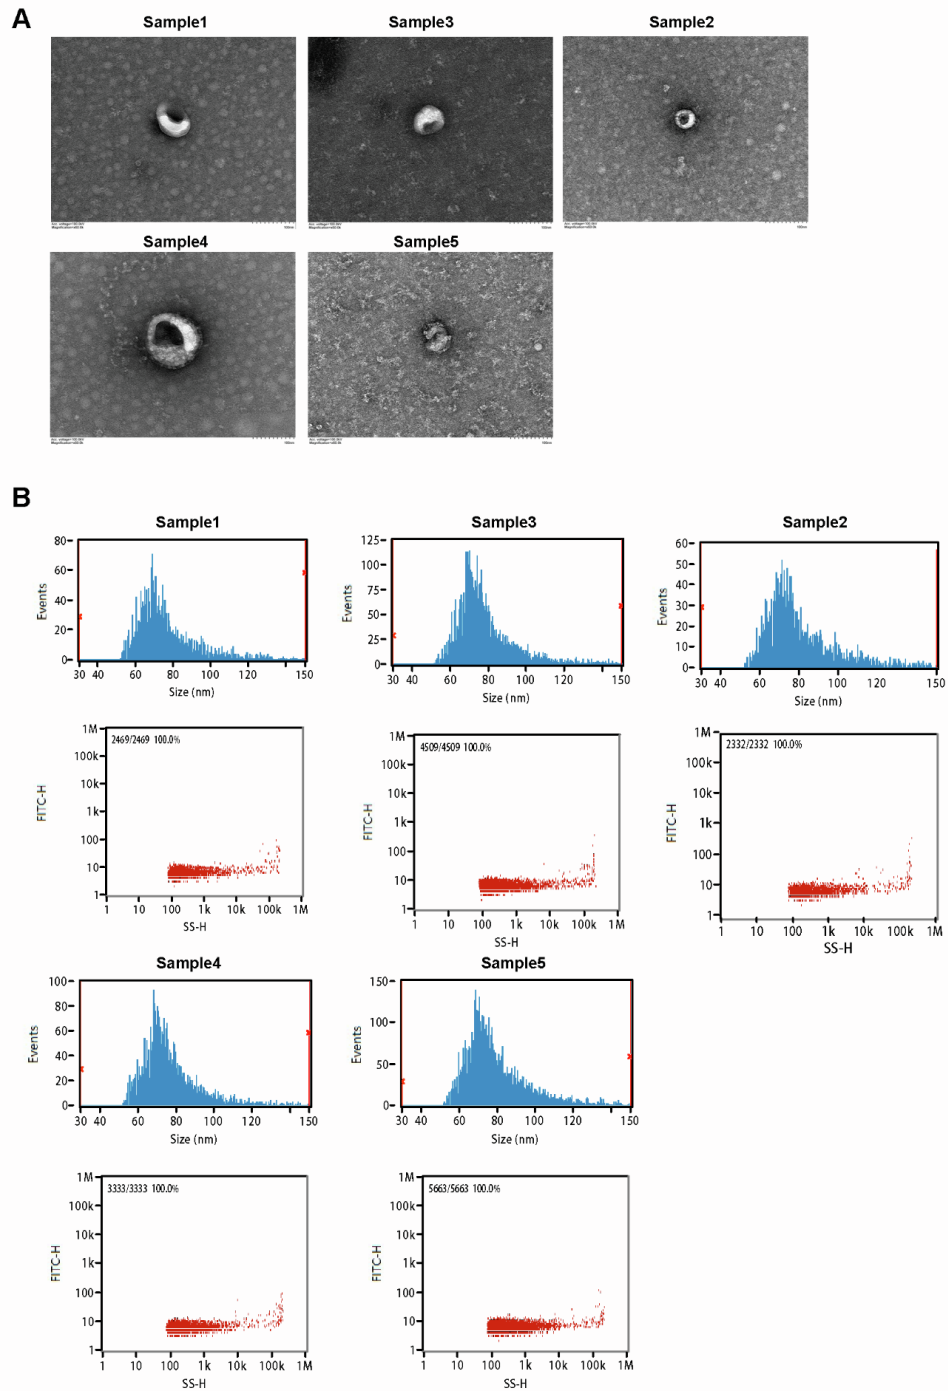

## Figure S1

(A) Representative plasma exosomes detected by transmission electron microscopy. (B) Size of plasma exosomes analyzed by high sensitivity flow cytometry.

**Fig. S2**

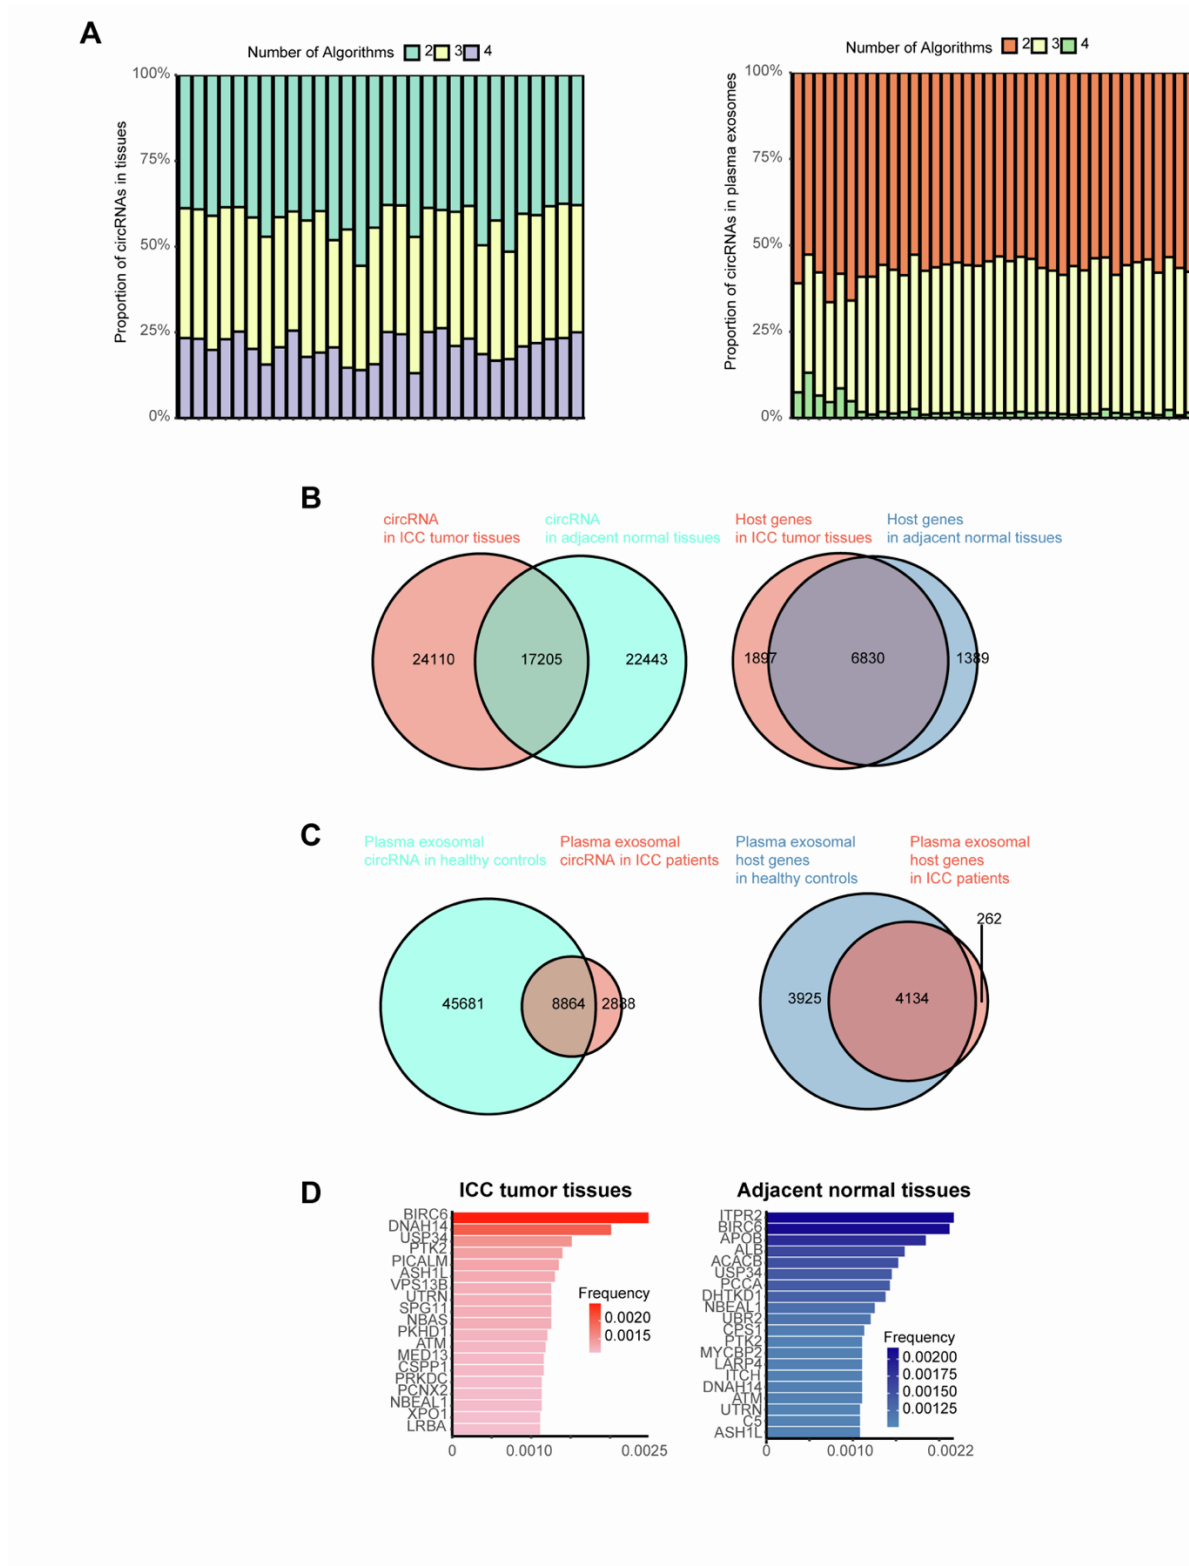

## Figure S2

(A) Proportion of circRNAs predicted by circRNA\_finder, find\_circ, Circexplorer, and CIRI2 in ICC tumor tissues and adjacent normal tissues (left panel), and plasma exosomes of patients with ICC and healthy controls (right panel). (B) Overlapping between circRNAs (left panel) and host genes (right panel) in ICC tumor tissues and adjacent normal tissues. (C) Overlapping between circRNAs (left panel) and host genes (right panel) in plasma exosomes of patients with ICC and healthy controls. (D) Top back spliced host genes in ICC tumor tissues and adjacent normal tissues.

**Fig. S3**

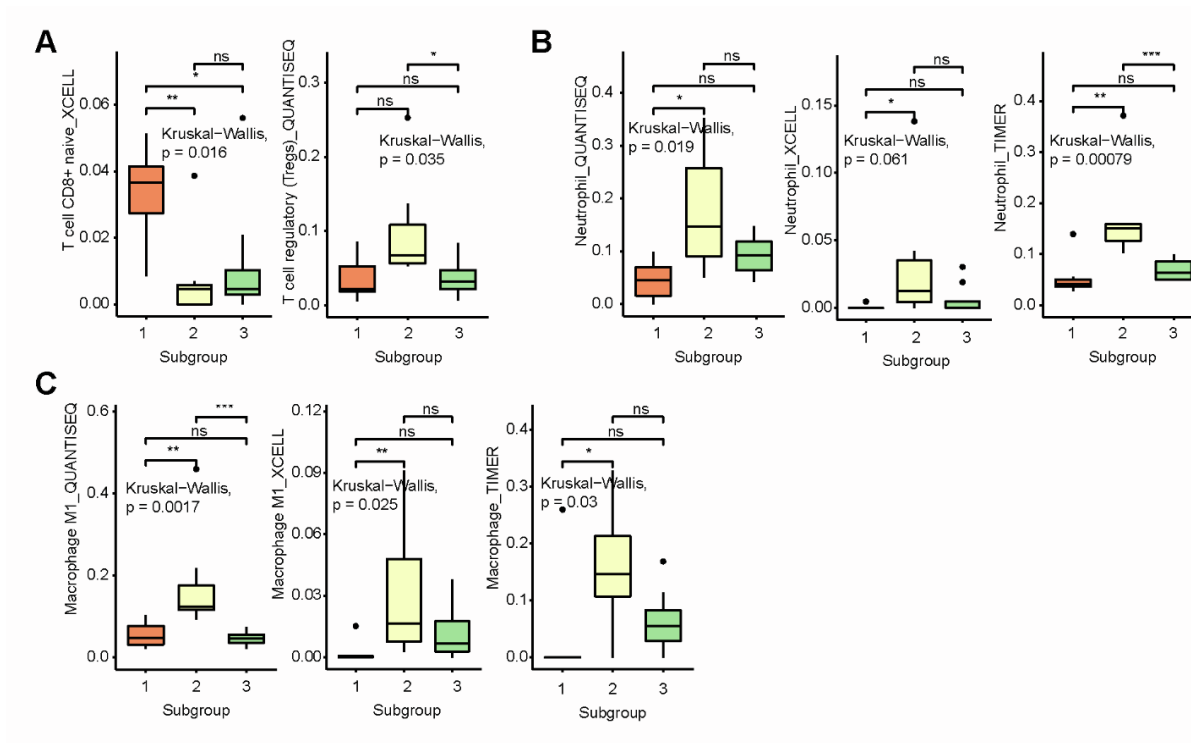

**Figure S3**

(A) Infiltration of CD8+ T cell and regulatory T cell in ICC subgroups. (B) Infiltration of neutrophil in ICC subgroups. (C) Infiltration of M1 macrophage in ICC subgroups.

Fig. S4

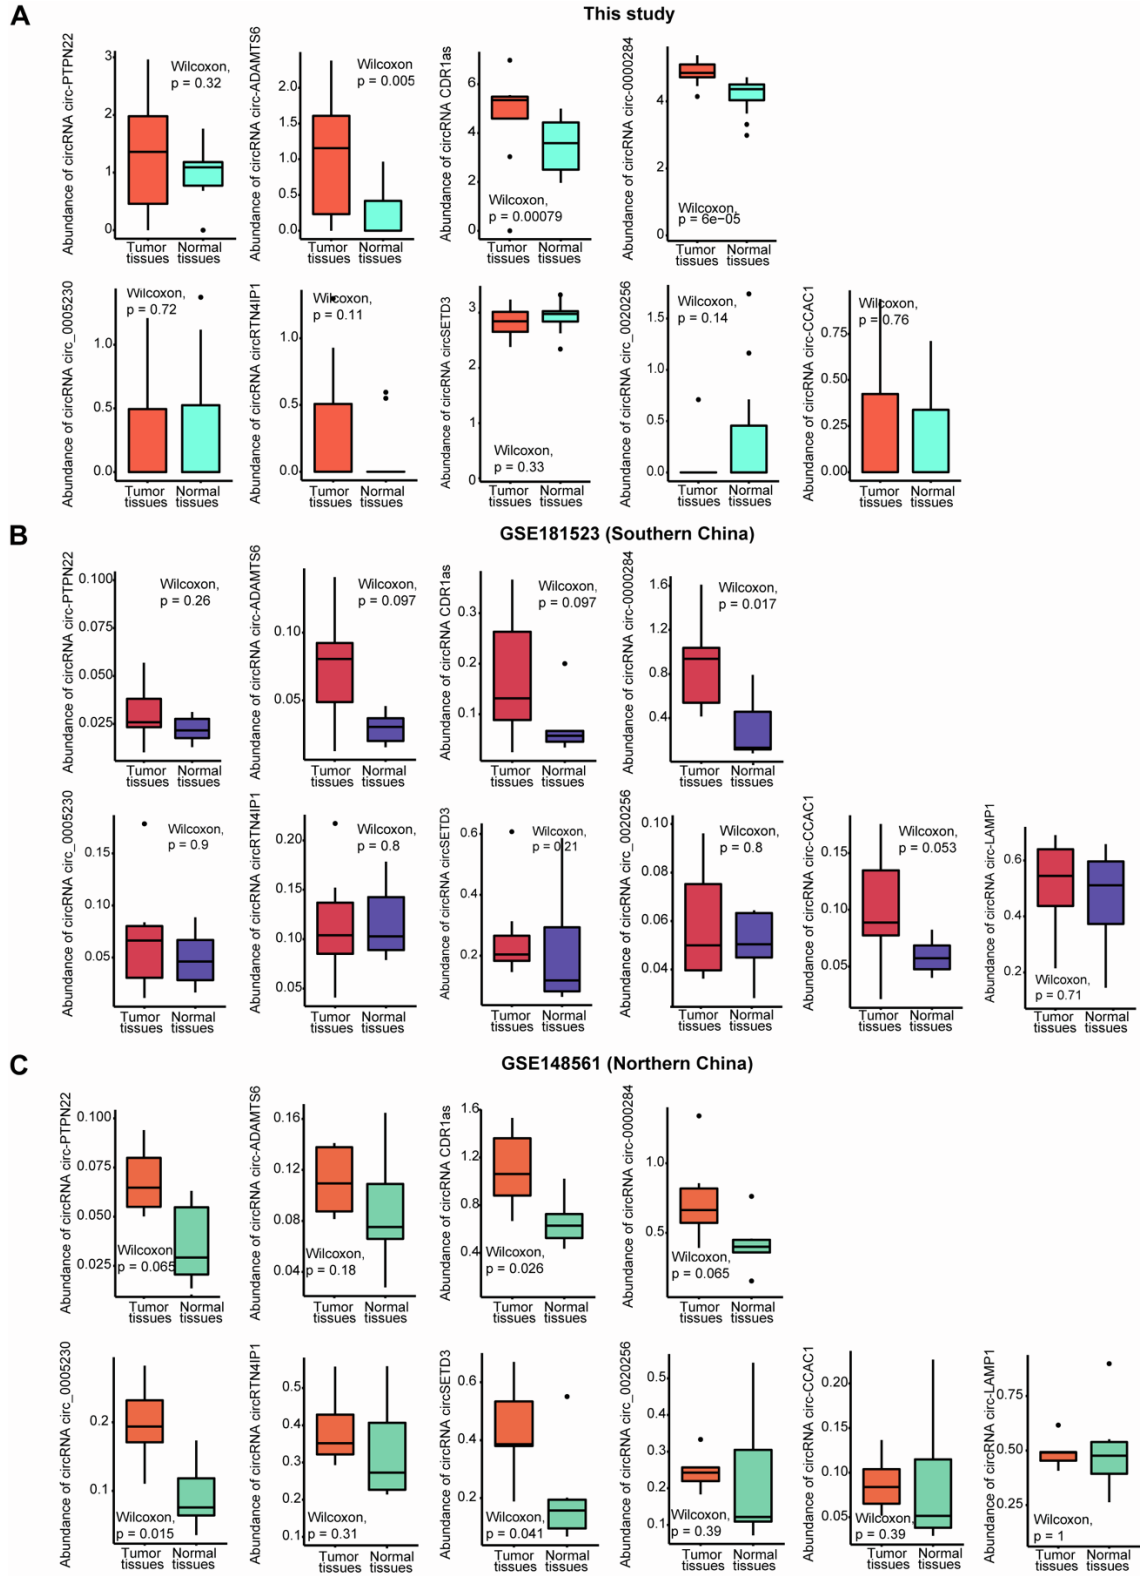



## Figure S4

Differential expression of circ-PTPN22, circ-ADAMTS6, and the circRNAs reported by recent publications in (A) This study; (B) GSE181523 (Southern China) and (C) GSE148561 (Northern China).

Fig. S5

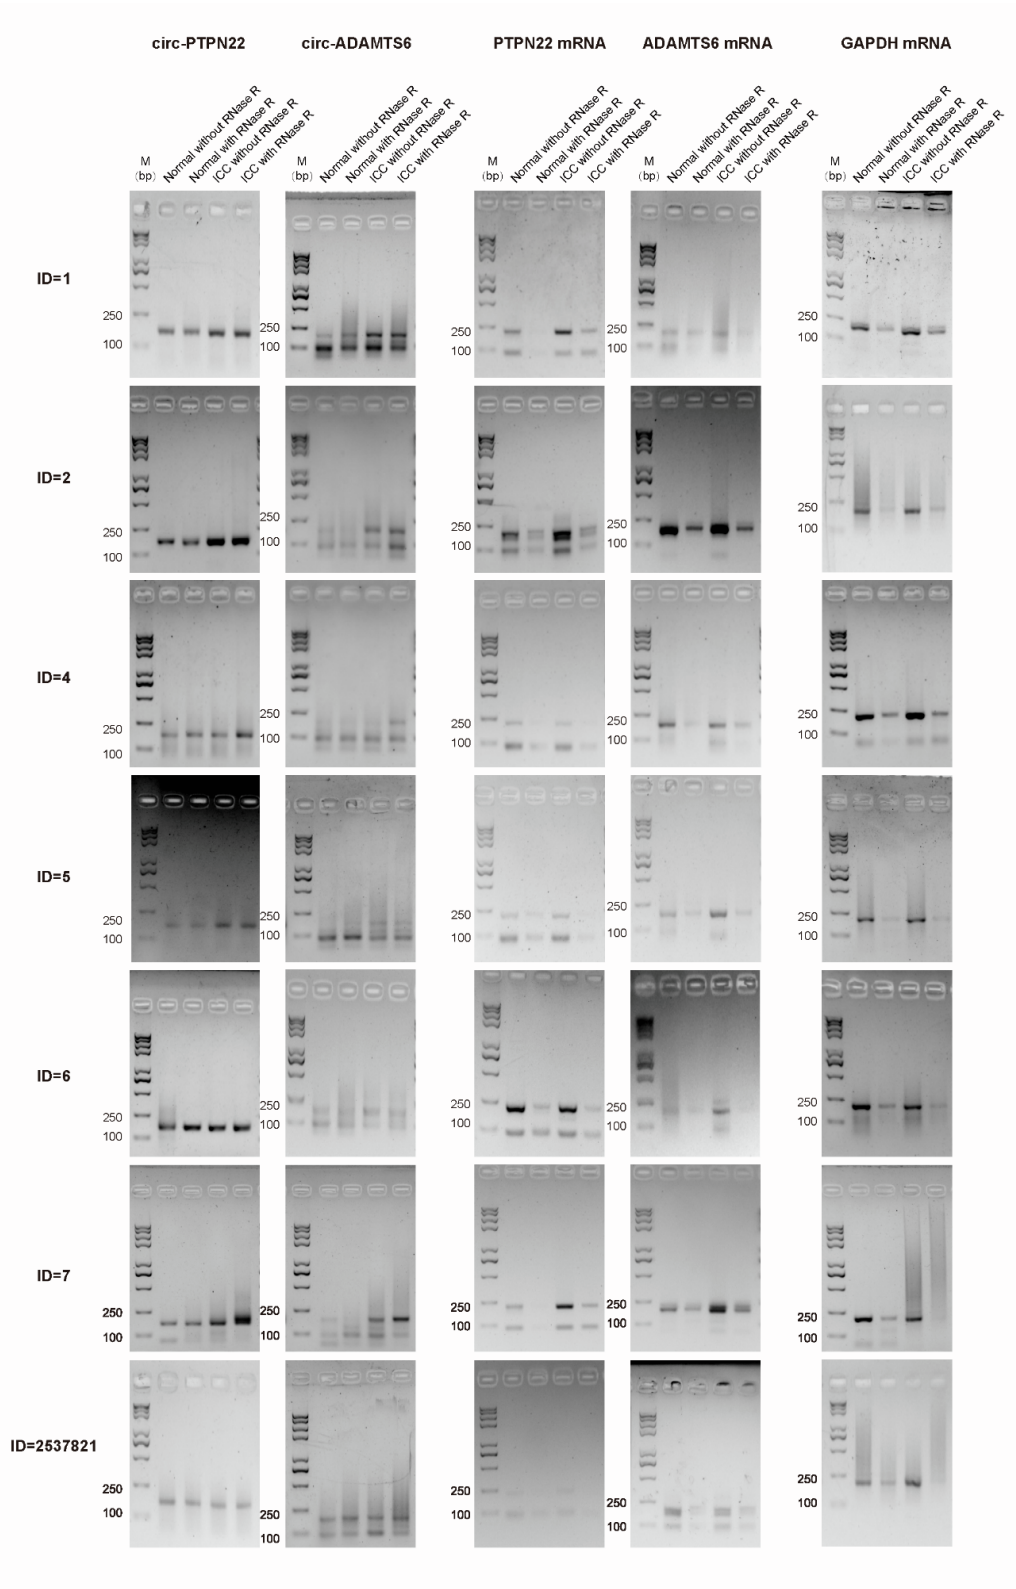

**Figure S5**

RT-qPCR of PTPN22 mRNA, ADAMTS6 mRNA, circ-PTPN22, and circ-ADAMTS6, analyzed by 2% agarose gel electrophoresis and stained with ExRed.

Fig. S6

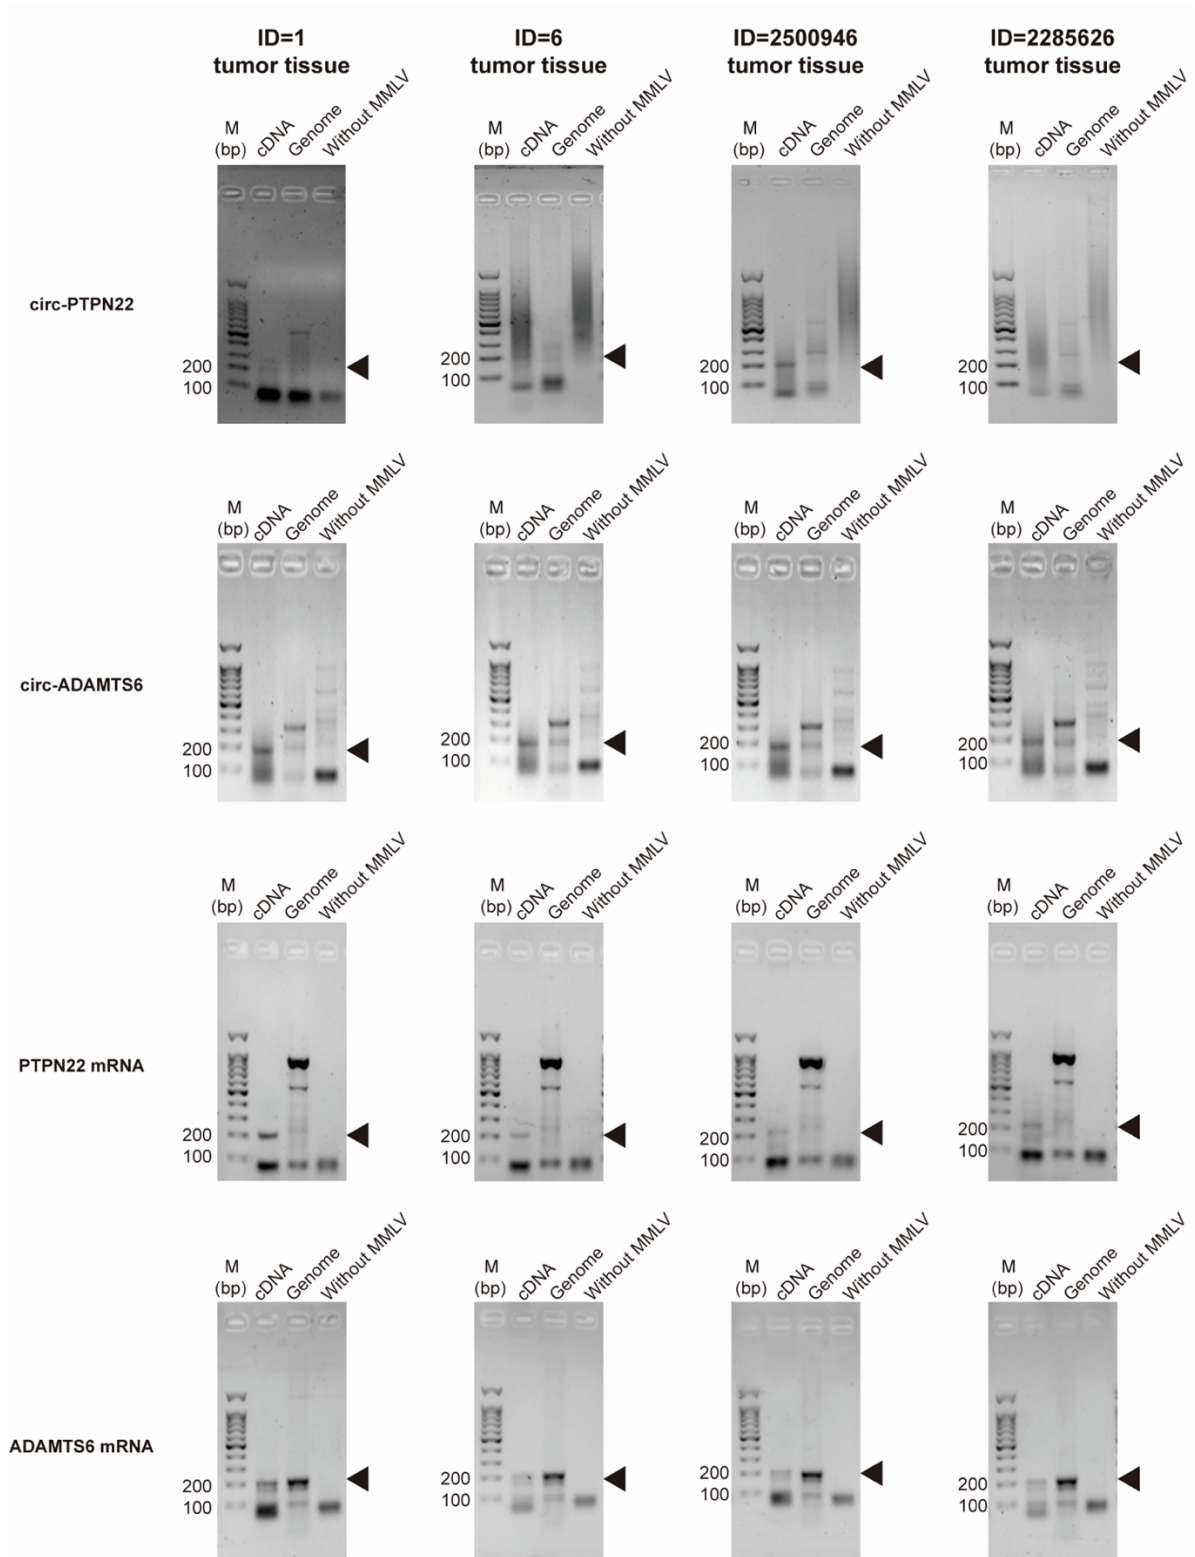

## Figure S6

PCR of PTPN22 mRNA, ADAMTS6 mRNA, circ-PTPN22, and circ-ADAMTS6 from the tumor tissues, analyzed by 2% agarose gel electrophoresis and stained with ExRed.

**Fig. S7**

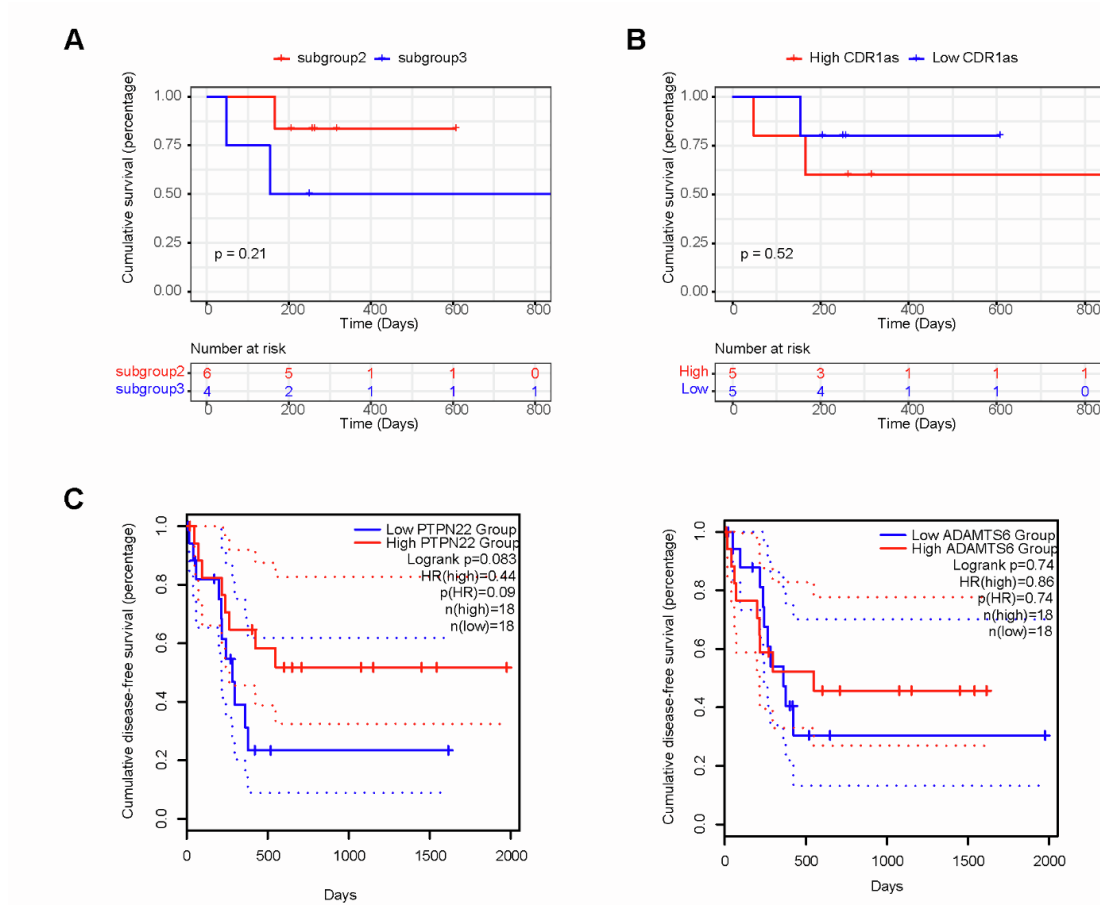

**Figure S7**

(A) Overall survival of patients with ICC in subgroup 2 (n=6) versus subgroup 3 (n=4). (B) Overall survival of patients whose ICC tumor tissues expressing high (n=5) versus low (n=5) levels of CDR1as. (C) Disease-free survival of TCGA-CHOL patients whose ICC tumor tissues expressing high (n=18) versus low (n=18) levels of PTPN22 and ADAMTS6, respectively.
