# Supplementary material for: Exosomal circ-PTPN22 and circ-ADAMTS6 mark T cell exhaustion and neutrophil extracellular traps in Asian intrahepatic cholangiocarcinoma
Source: PubMed Central journal article supplement — Mol Ther Nucleic Acids. 2022 Dec 23;31:151–63. doi: 10.1016/j.omtn.2022.12.012 (PMC9841234; doi:10.1016/j.omtn.2022.12.012), 2022-12-23
Supplement: mmc3.pdf [file mmc3.pdf]

# Exosomal circ-PTPN22 and circ-ADAMTS6 mark T cell exhaustion and neutrophil extracellular traps in Asian intrahepatic cholangiocarcinoma

Xuezhu Wang,<sup>1,2,5</sup> Guanqun Wang,<sup>3,5</sup> Zilong Wu,<sup>4,5</sup> Yucheng Dong,<sup>1,2</sup> Yue Shi,<sup>1,2</sup> Fan Yang,<sup>1</sup> Xinyu Chen,<sup>1,2</sup> Jun Wang,<sup>4</sup> Shunda Du,<sup>1</sup> Haifeng Xu,<sup>1</sup> and Yongchang Zheng<sup>1</sup>

<sup>1</sup>Department of Liver Surgery, Peking Union Medical College Hospital, Chinese Academy of Medical Sciences and Peking Union Medical College (CAMS & PUMC), Beijing 100730, China; <sup>2</sup>Peking Union Medical College (PUMC), Chinese Academy of Medical Sciences and Peking Union Medical College (CAMS & PUMC), Beijing 100730, China; <sup>3</sup>School of Life Sciences, Tsinghua-Peking Center for Life Sciences, Center for Synthetic and Systems Biology, Ministry of Education Key Laboratory of Bioinformatics, Tsinghua University, Beijing 100084, China; <sup>4</sup>Department of Hepatobiliary Surgery, Hunan Provincial People's Hospital, the First Affiliated Hospital of Hunan Normal University, Changsha 410005, China

**Intrahepatic cholangiocarcinoma (ICC) is a liver tumor featured by challenges of non-invasive early diagnosis and a higher prevalence rate in Asian countries. These characteristics necessitate the development of liquid biopsy and immunotherapy methods to improve the prognosis of patients with ICC. Herein, we conducted a pilot study on the transcriptome of tumor tissues, adjacent normal tissues, and plasma exosomes of Asian patients with ICC from northern and southern China. We identified a subgroup of immunogenic Asian ICC, which is different from Caucasian ICC and is characterized by T cell exhaustion and neutrophil extracellular traps. The levels of circ-PTPN22 (hsa\_circ\_0110529) and circ-ADAMTS6 (hsa\_circ\_0072688), potential circRNA biomarkers, were elevated in the ICC tumor tissues and plasma exosomes of this subgroup than in the other subgroups and normal controls. These circRNAs were derived from post-transcriptional backsplicing of PTPN22 and ADAMTS6 that were expressed in T cells and endothelial cells, respectively, in the ICC microenvironment. Our results revealed a subgroup of Asian ICC characterized by T cell exhaustion and neutrophil extracellular traps and marked by elevated levels of circ-PTPN22 and circ-ADAMTS6 in tumor tissues and plasma exosomes. This subgroup is potentially detectable by plasma exosomal circRNAs and treatable with immune checkpoint blockade.**

## INTRODUCTION

Cholangiocarcinoma has been shown to exhibit a rising prevalence, especially in Asian countries, contributing to the incidence of approximately 15% of primary liver cancer cases and 2% of cancer-related deaths worldwide.<sup>1</sup> Intrahepatic cholangiocarcinoma (ICC) is highly malignant because of its tendency to infiltrate the nerve and lymphatic tissues, and its clinical manifestations are rarely observed in patients before the blocking of the bile duct by the tumor.<sup>2</sup> As a result, only 20%–40% of patients with ICC present with indications for surgical resection, after which they still face a dismal postoperative

prognosis, that is, a 3-year survival rate of 40%–50% and a recurrence rate of 46%–65%.<sup>3</sup>

ICC in Asian and Caucasian populations is known to arise from different etiologies. Hepatolithiasis and parasitic infections are more prevalent among Asian patients, while nonalcoholic fatty liver disease and metabolic abnormalities are associated with ICC in Western populations.<sup>4</sup> A comparative analysis of the mutational landscape revealed a higher burden of DNA repair mutations in Asian patients with ICC.<sup>5</sup> Furthermore, transcriptomic characteristics of Asian ICC are related to obesity, T cell infiltration, and bile acid metabolism.<sup>6</sup>

Translational therapeutic techniques, such as liquid biopsy biomarkers and immune checkpoint blockade, are expected to improve the therapy of ICC. A subset of ICC was observed with enriched immune infiltration; however, subgroup-specific biomarkers require further investigation.<sup>7</sup> Likewise, an inflamed subgroup likely treatable with checkpoint blockade was identified in Caucasian patients with ICC.<sup>8</sup> A subgroup of cholangiocarcinoma (intrahepatic, perihilar, and distal) presents with activated immune pathways, and elevated programmed cell death 1 (PD-1) and programmed cell death ligand 1 (PD-L1) expression.<sup>9</sup>

Received 11 November 2021; accepted 20 December 2022;  
<https://doi.org/10.1016/j.omtn.2022.12.012>.

<sup>5</sup>These authors contributed equally

**Correspondence:** Haifeng Xu, Department of Liver Surgery, Peking Union Medical College Hospital, Chinese Academy of Medical Sciences and Peking Union Medical College (CAMS & PUMC), No.1 Shuaifuyuan Wangfujing, Dongcheng District, Beijing 100730, China.  
**E-mail:** [xuhf781120@sina.com](mailto:xuhf781120@sina.com)

**Correspondence:** Yongchang Zheng, Department of Liver Surgery, Peking Union Medical College Hospital, Chinese Academy of Medical Sciences and Peking Union Medical College (CAMS & PUMC), No.1 Shuaifuyuan Wangfujing, Dongcheng District, Beijing 100730, China.  
**E-mail:** [yongchang\\_zheng@outlook.com](mailto:yongchang_zheng@outlook.com)

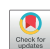

Circular RNAs (circRNAs) are potential biomarker candidates because of their covalently closed structure, which is stable in plasma exosomes. For example, cerebellar degenerative-related protein-1 antisense (CDR1as), which has been extensively studied in multiple cancer types,<sup>10</sup> can serve as a biomarker for ICC.<sup>11</sup> Similarly, circ\_0005230,<sup>12</sup> circDNM3OS,<sup>13</sup> circ-LAMP1,<sup>14</sup> circ0021205,<sup>15</sup> circRTN4IP1,<sup>16</sup> and circSETD3<sup>17</sup> can promote the proliferation, growth, or metastases of ICC. circ\_0020256,<sup>18</sup> which is associated with the tumor microenvironment, is an exosomal circRNA produced by tumor-associated M2 macrophages and promotes cancer progression. circ-CCAC1, whose expression is elevated in ICC tumor tissues and bile-derived extracellular vesicles, disrupts the endothelial barrier and induces angiogenesis.<sup>19</sup> Similarly, circ-0000284, whose expression is elevated in ICC cancer cells and cancer cell-derived extracellular vesicles, stimulates the migration and proliferation of surrounding cells.<sup>20</sup>

In this pilot study, we conducted a multifaceted transcriptomic analysis of ICC tumor tissues, adjacent normal tissues, and plasma exosomes donated by a cohort of 14 Asian patients from northern China (n = 7) and southern China (n = 7) and compared them with Caucasian ICC, aiming to discover exosomal circRNA biomarkers of Asian ICC subgroups potentially treatable by immunotherapy.

## RESULTS

### circRNA profiling in ICC tumor tissues and plasma exosomes of patients with ICC revealed potential biomarkers

A total of 14 Asian patients with ICC donated ICC and paired adjacent normal tissues, among which six patients donated peripheral blood samples for plasma exosome extraction (Figure 1A, Table S1). The plasma exosomes of patient 5 from southern China were sampled twice to verify the reproducibility of our methods. In addition, the plasma exosomes were steadily detected using transmission electron microscopy (Figures 1B and S1A), high-sensitivity flow cytometry (Figures 1C and S1B; Tables S2 and S3), and western blotting of plasma exosome markers, including TSG101 and CD63 (positive markers) and calnexin (negative marker) proteins (Figure 1D).

To minimize the bias of every single algorithm,<sup>21</sup> we retained the circRNAs predicted by  $\geq 2$  among the four top-cited circRNA prediction algorithms, including circRNA\_finder,<sup>22</sup> find\_circ,<sup>23</sup> Circexplorer,<sup>24</sup> and CIRI2<sup>25</sup> (Figure S2A). The proportion of overlap between circRNAs in ICC tumor tissues and adjacent normal tissues was higher than that between the host genes; a similar phenomenon was observed with the plasma exosomal circRNAs (Figures S2B and S2C). Dynein axonemal heavy chain 14 (DNAH14) was increasingly backspliced in tumor tissues compared with that in adjacent normal tissues, which was consistent with our previous observations in pan-cancer tissues (Figure S2D).<sup>26</sup>

We observed that the ICC tumor tissues and adjacent normal tissues had distinct circRNA profiles (Figure 1E). Particularly, differences between sample types (principal component 1) were greater than those between northern and southern China populations (principal component 2) (Figure 1F). Similarly, circRNAs in plasma exosomes of patients with ICC were distinct from those of healthy controls

(Figure 1G). We regarded the overlapping between upregulated circRNAs in ICC tumor tissues (Figure 1H) and plasma exosomes of patients with ICC (Figure 1I) as potential ICC biomarkers for liquid biopsy, among which the repeatedly reported CDR1as<sup>11</sup> and circ-0000284<sup>20</sup> were also observed (Figures 1J and 1K).

### A subgroup of immunogenic Asian ICC was characterized by T cell exhaustion and neutrophil extracellular traps

To reveal the characteristics of Asian patients with ICC, we included an additional eight pairs of ICC tumor tissues and adjacent normal tissues donated by Caucasian patients with ICC from The Cancer Genome Atlas (TCGA) (Figure 2A). The correlation between ICC tumor tissue samples revealed three subgroups among Asian and Caucasian patients with ICC. Subgroup 1 was mostly detected among Caucasian patients. Subgroup 2 was found in northern and southern China populations, showing a strong correlation among samples. Subgroup 3, which was detected in both Caucasian and Asian patients, demonstrated higher heterogeneity.

We analyzed the infiltration of adaptive and innate immune cells in these ICC tumor tissues by using  $\geq 2$  algorithms, including ImmuCellAI,<sup>27</sup> xCell,<sup>28</sup> quanTIseq,<sup>29</sup> and TIMER<sup>30</sup> (Figure 2B). We found that subgroup 2 showed decreased infiltration by CD8<sup>+</sup> T cells, compared with that of subgroup 1, and increased infiltration of regulatory T cells (Figures 2C and S3A), neutrophils (Figures 2D and S3B), and M1 macrophages (Figures 2D and S3C), compared with that of subgroups 1 and 2.

Gene set variation analysis (GSVA) further revealed the differential immunologic features among these ICC subgroups (Figure 2E). Compared with subgroups 1 and 3, subgroup 2 showed prominent immunogenic features, such as Fc gamma receptor (FCGR)-dependent phagocytosis, multiple processes in platelet activation and thrombosis, and signaling mediated by granulocyte colony-stimulating factor (G-CSF), interleukin 3, interleukin 5, granulocyte-macrophage colony-stimulating factor (GM-CSF), and G protein beta gamma. Specific oncogenic signaling pathways that potentially interact with these immune pathways were also activated in subgroup 2, including growth hormone receptor signaling, fibroblast growth factor receptor 1 (FGFR1) mutant receptor activation, and signaling mediated by B-Raf proto-oncogene (BRAF) and Raf-1 proto-oncogene (RAF) fusions and mitogen-activated protein kinase 1 (MAPK). Particularly, the MET proto-oncogene (MET) signaling promoted cell motility via the activation of Ras-related protein 1 (RAP1), and Rac family small GTPase 1 (RAC1), which indicated an increased tendency for metastases when combined with extracellular matrix degradation.

Further, we investigated the expression of classical marker genes associated with these immune and oncogenic features of subgroup 2 (Figure 2F). Upregulated immune checkpoint genes, including T cell immunoreceptor with Ig and ITIM domains (TIGIT), hepatitis A virus cellular receptor 2 (HAVCR2), CD274 (encoding PD-L1), cytotoxic T-lymphocyte-associated protein 4 (CTLA4), and forkhead box P3 (FOXP3), implicated T cell exhaustion and are possible therapeutic

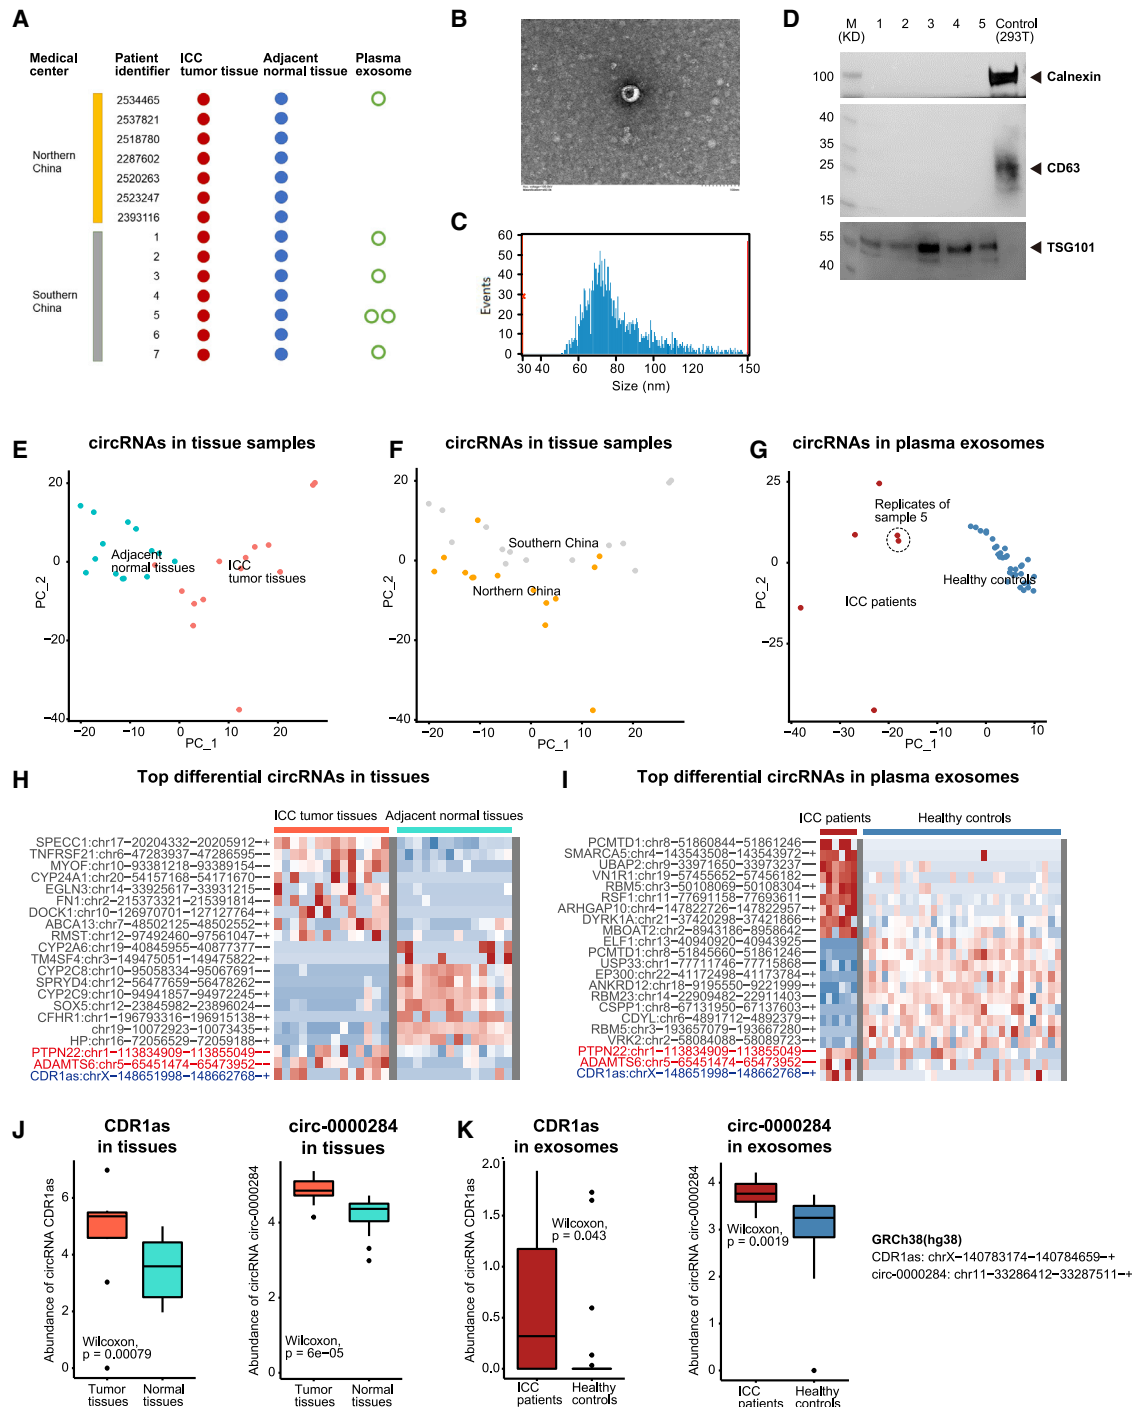

**Figure 1. Landscape of circRNAs in tumor tissues and plasma exosomes of Asian ICC**

(A) Sampling and sequencing of the Asian ICC patient cohort. (B) Representative plasma exosomes detected by transmission electron microscopy. (C) The size of plasma exosomes analyzed by high-sensitivity flow cytometry. (D) Western blotting of plasma exosome markers, including TSG101, CD63, and calnexin proteins. (E) Principal-component analysis (PCA) of the circRNA profile in ICC tumor tissues and adjacent normal tissues, labeled by sample types. (F) PCA of the circRNA profile in ICC tumor tissues and adjacent normal tissues, labeled by medical centers. (G) PCA of the circRNA profile in plasma exosomes of patients with ICC and healthy controls (provided by ExoRbase), labeled by sample types. (H) Top differential circRNAs in ICC tumor tissues versus adjacent normal tissues. (I) Top differential circRNAs in plasma exosomes of patients with ICC versus healthy controls. (J) The abundance of CDR1as and circ-0000284 in ICC tumor tissues and adjacent normal tissues. (K) The abundance of CDR1as and circ-0000284 in plasma exosomes of patients with ICC and healthy controls.

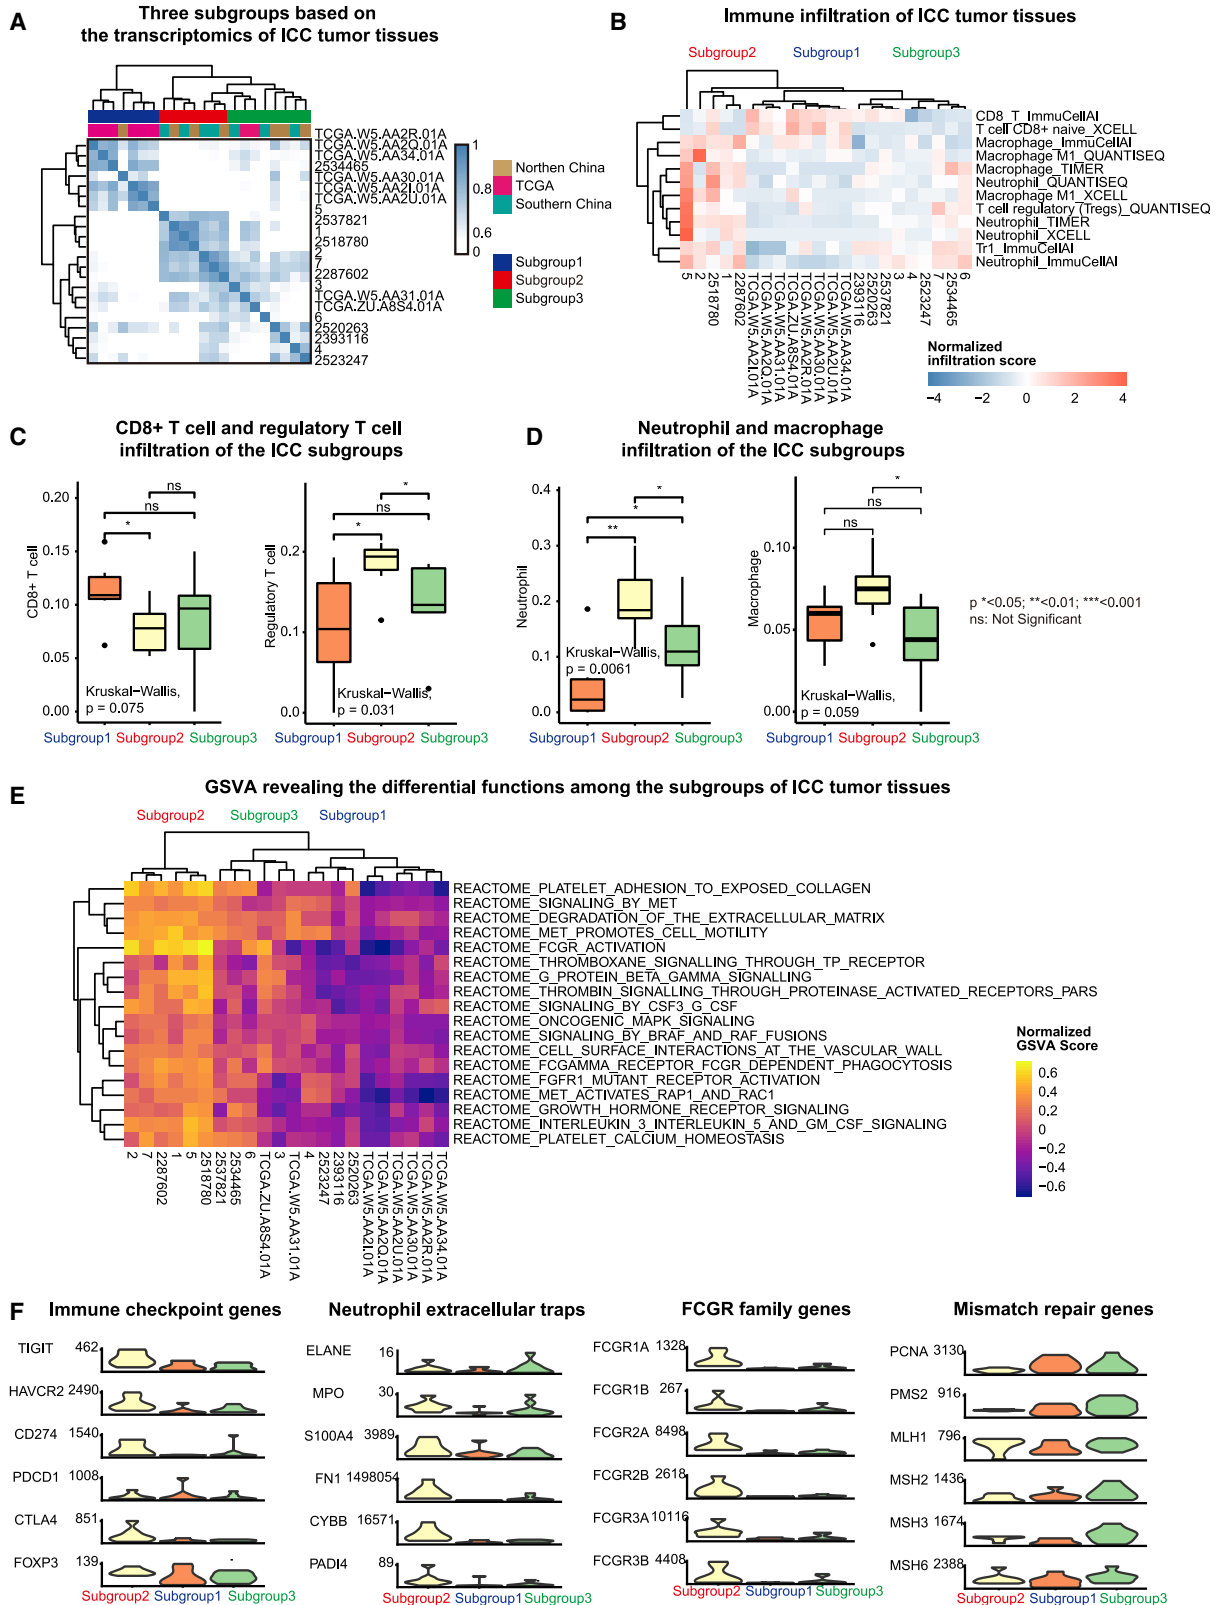

(legend on next page)

targets for immune checkpoint blockade in subgroup 2. Increased neutrophil infiltration, platelet activation, and thrombosis indicated neutrophil extracellular traps in subgroup 2. We found the upregulation of genes associated with neutrophil extracellular traps, including myeloperoxidase (MPO), S100 calcium-binding protein A4 (S100A4), fibronectin 1 (FN1), NADPH oxidase 2 (NOX2), and peptidyl arginine deiminase 4 (PADI4) in subgroup 2. Moreover, subgroup 2 had an exclusive expression of FCGR1A, FCGR1B, FCGR2A, FCGR2B, FCGR3A, and FCGR3B, all of which belong to the FCGR family that is highly expressed in neutrophils and macrophages. In addition, mismatch repair (MMR) genes associated with the immunogenicity of tumors, such as proliferating cell nuclear antigen (PCNA), PMS1 homolog 2, mismatch repair system component (PMS2), MutS homolog 2 (MSH2), MutS homolog 3 (MSH3), and MutS homolog 6 (MSH6) were downregulated in subgroup 2.

#### Elevated circ-PTPN22 and circ-ADAMTS6 levels in ICC tumor tissues and plasma exosomes marked this immunogenic Asian ICC subgroup

To discover potential exosomal circRNA biomarkers, we explored the circRNAs with elevated levels in both ICC tumor tissue plasma exosomes of the immunogenic Asian ICC subgroup, especially those mechanistically associated with T cell exhaustion and neutrophil extracellular traps.

We observed that the subgroup of immunogenic Asian ICC was distinguished not only by gene expression but also by the circRNA profile (Figure 3A) and plasma exosomes (Figure 3B). Overlapping between the elevated circRNAs in the ICC tumor tissues of subgroup 2 (Figure 3C) and those in the plasma exosomes of subgroup 2 (Figure 3D) revealed potential circRNA biomarkers for the immunogenic Asian ICC. Among these potential biomarkers, circRNAs derived from protein tyrosine phosphatase non-receptor type 22 (PTPN22) and ADAM metalloproteinase with thrombospondin type 1 motif 6 (ADAMTS6) had a potential functional association with the immunogenicity of ICC tumor tissue. circ-PTPN22 (hsa\_circ\_0110529), circ-ADAMTS6 (hsa\_circ\_0072688), and CDR1as levels were upregulated in ICC tumor tissues (Figure 3E) and plasma exosomes of patients with ICC in subgroup 2 (Figure 3F). Compared with CDR1as, circ-PTPN22 and circ-ADAMTS6 performed better in distinguishing between subgroup 2 and subgroup 3.

Moreover, circ-PTPN22, circ-ADAMTS6, and CDR1as were also more abundant in the ICC tumor tissues compared with the adjacent normal tissues collected by the GEO circRNA datasets: GSE181523 (Southern China,  $n = 7$ )<sup>31</sup> and GSE148561 (Northern China,  $n = 6$ )<sup>32</sup> (Figure 4A). This difference in the levels of circ-PTPN22 was less significant because its expression in ICC tumor tissues of subgroup 3 was as low as in the adjacent normal tissue (Figure 3E).

Although the immune subgroups among these samples were unknown, circ-PTPN22 and circ-ADAMTS6 potentially determined the identical subgroups as they were significantly co-expressed (Figure 4B). Also, among the circRNAs that have been reported as ICC biomarkers, CDR1as and circ-0000284 levels were elevated in the ICC tumor samples in all three datasets, while circ-CCAC1, circ\_0005230, circSETD3 levels were upregulated in one of the three datasets (Figures S4A–S4C, Table S4). This validation implied that circ-PTPN22 and circ-ADAMTS6 were potentially robust ICC biomarkers similar to CDR1as and circ-0000284, which were previously reported in several studies.

Interestingly, PTPN22 and ADAMTS6, the host genes of circRNA biomarkers, were also upregulated in ICC tumor tissues of subgroup 2 (Figure 4C). Single-cell transcriptome of the GEO dataset, GSE138709, revealed the epithelial cells (cholangiocytes and cholangiocarcinoma cells), endothelial cells, CD8<sup>+</sup> T cells, regulatory T cells, natural killer cells (NK cells), B cells, plasma cells, monocytes, macrophages, adipocytes, and fibroblasts in ICC tumor tissues (Figure 4D).<sup>33</sup> PTPN22 was expressed in regulatory T cells, CD8<sup>+</sup> T cells, and NK cells, whereas ADAMTS6 was exclusively expressed in endothelial cells. A subpopulation of these regulatory T cells highly expressed FOXP3, TIGIT, and CTLA4 (Figure 4E).

#### Validation of circ-PTPN22 and circ-ADAMTS6 as biomarkers in Asian ICC tumor tissues of the immunogenic subgroup

Finally, we validated the upregulation of circ-PTPN22 and circ-ADAMTS6 in ICC tumor tissues of subgroup 2 by using quantitative RT-PCR (qRT-PCR) (Table S5). The Sanger sequencing of the PCR products demonstrated the junction sites of circ-PTPN22 and circ-ADAMTS6 backsplicing (Figure 5A). As expected, these circRNAs were protected from RNase R degradation by their covalently closed structures, while the linear mRNAs of their host genes were susceptible to degradation. Consistent with the results of RNA sequencing (RNA-seq), circ-PTPN22, circ-ADAMTS6, and their host genes were expressed at a higher level in subgroup 2 than in subgroup 3 and adjacent normal tissues (Figures 5B and 3E, Table S6). This experimental validation used multiple samples in our cohort of patients with ICC from southern and northern China (Figures 5C and S5).

In addition, we used PCR to validate that amplicons of backsplicing junction sites of circ-PTPN22 and circ-ADAMTS6 were from the transcriptome instead of the genome, which supported the hypothesis that backsplicing is a post-transcriptional process (Table S7). The amplicons of circ-PTPN22 and circ-ADAMTS6 were detected in RNA (cDNA library) but not in genomic DNA. In contrast, those of host genes, PTPN22 and ADAMTS6 presented in both the RNA and genomic DNA. The negative control showed that the circRNAs and host gene

#### Figure 2. Transcriptomic analysis of immune infiltration in Asian ICC tumor tissues

(A) Unsupervised hierarchical clustering of the transcriptome of Asian and Caucasian ICC tumor tissues. (B) Immune infiltration in the three ICC subgroups, predicted by ImmuCellAI, xCell, TIMER, and quanTlseq. (C) Infiltration of CD8<sup>+</sup> T cells and regulatory T cells in ICC subgroups, predicted by ImmuCellAI. (D) Infiltration of neutrophils and macrophages in ICC subgroups, predicted by ImmuCellAI. (E) Gene set variation analysis (GSVA) of ICC tumor tissues based on the Reactome database. (F) Expression of immune checkpoint genes, neutrophil extracellular trap-associated genes, FCGR family genes, and mismatch repair genes.

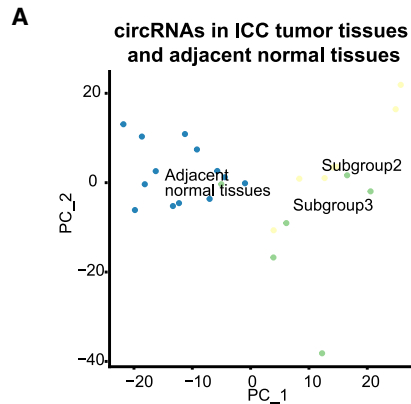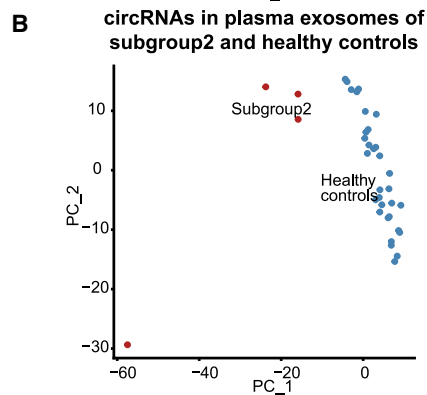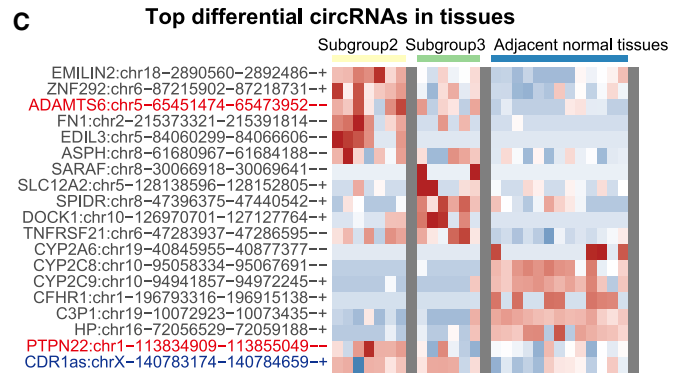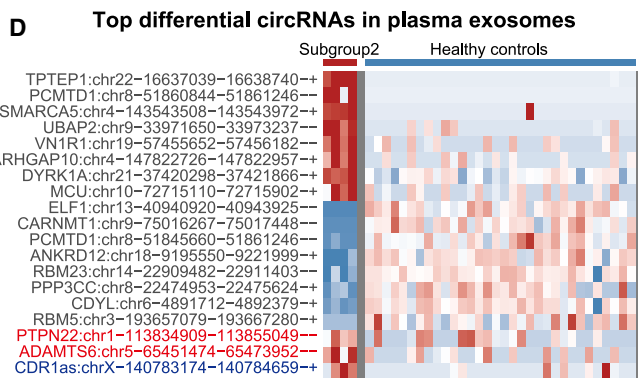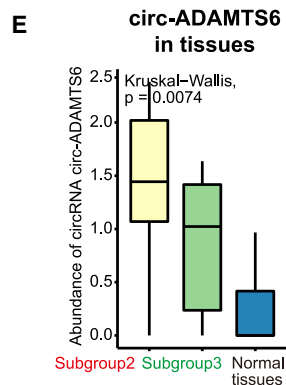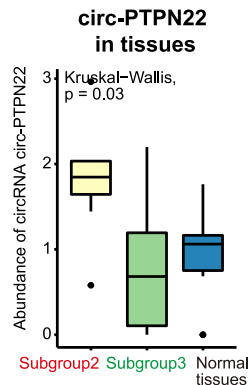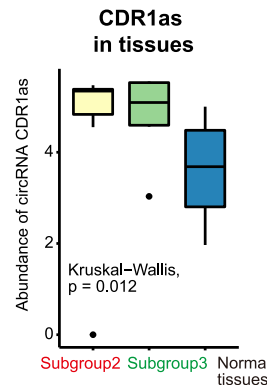

**GRCh38(hg38)**  
 circ-ADAMTS6:chr5-65451474-65473952--  
 circ-PTPN22:chr1-113834909-113855049--  
 CDR1as: chrX-140783174-140784659--

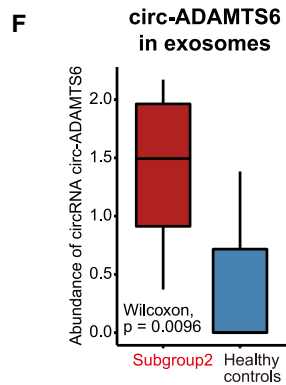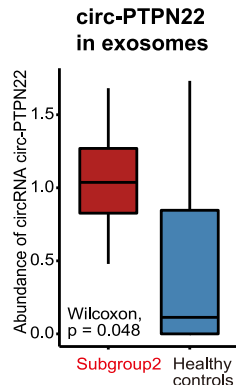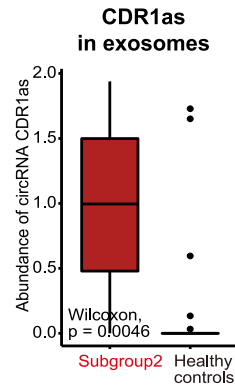

(legend on next page)

mRNAs were absent without MMLV Reverse Transcriptase treatment (Figure S6).

Overall, these validations showed that circ-PTPN22 and circ-ADAMTS6 were expressed in higher levels in ICC tumor tissues of subgroup 2 compared with subgroup 3 and adjacent normal tissues, and had covalently closed structures generated by post-transcriptional backsplicing at the junction sites.

## DISCUSSION

This study integrated the transcriptomes of plasma exosomes, tumor tissues, and adjacent normal tissues of ICC, and revealed that PTPN22 and circ-ADAMTS6 in plasma exosomes were associated with a subgroup of immunogenic Asian ICC characterized by T cell exhaustion and neutrophil extracellular traps.

Neutrophil extracellular traps were likely to be associated with T cell exhaustion in this subgroup of immunogenic ICC (Figures 2D–2F). Triggered by G-CSF and reactive oxygen species catalyzed by NOX2, the biological processes of neutrophil extracellular traps include increased neutrophil recruitment, PADI4-mediated decondensation of chromatin, accumulation of neutrophil elastase and MPO, and the release of histones into the extracellular space. In particular, neutrophil extracellular traps have been found to promote cancer-associated thrombosis, degradation of the extracellular matrix, and cancer metastases.<sup>34–36</sup>

Most recently, an analysis of single-cell full-length transcriptome has provided a resource of circRNA expression in different cell types.<sup>37</sup> This data resource demonstrated that circ-PTPN22 was expressed in regulatory and central memory T cells, whereas circ-ADAMTS6 was expressed in multiple types of stromal cells. These results add to our observation that host genes were co-expressed with circ-PTPN22 and circ-ADAMTS6 and were highly expressed in regulatory T cells, CD8<sup>+</sup> T cells, and endothelial cells, respectively (Figures 4C and 4E).

The host gene, PTPN22, encodes a lymphoid-specific intracellular phosphatase that regulates the T cell receptor signaling pathway, whose polymorphism serves as a regulator of the threshold of T cell activation.<sup>38</sup> More specifically, inhibition of PTPN22 enhanced T cell infiltration and anti-PD-L1 treatment<sup>39</sup> and promoted the activation of CD8<sup>+</sup> T cells and the response to checkpoint blockade. The expression of PTPN22 was positively correlated with regulatory T cells, M1 macrophages, and the level of immune checkpoint genes in multiple types of cancer, which was consistent with our observations of subgroup 2.<sup>40</sup> As a backspliced product of PTPN22, multiple

circRNAs have been reported to promote proliferation and inhibit T cell infiltration in pancreatic cancer,<sup>41</sup> be associated with epithelial-mesenchymal transformation and metastases of gastric cancer,<sup>42</sup> and serve as potential biomarkers of rheumatoid arthritis<sup>43</sup> and systemic lupus erythematosus.<sup>44</sup>

Another host gene, ADAMTS6, encodes a secreted multidomain matrix-associated zinc metalloendopeptidase that participates in tissue remodeling. Thus, the ADAMTS family plays an important role in neutrophil extracellular traps where inflammation and thrombosis occur in microvessels,<sup>45</sup> and its dysregulation contributes to tumor invasion and metastases.<sup>46</sup> circRNAs derived from the backsplicing of ADAMTS6 have been revealed to regulate interleukin 1-induced apoptosis of human chondrocytes in osteoarthritis.<sup>47,48</sup>

As for the potential prognostic value, patients in subgroup 2 demonstrated prolonged overall survival compared with those in subgroup 3, although this difference was not significant due to the small sample size (Figure S7A). High expression of CDR1as in ICC tumor tissues was associated with a poor prognosis, which was consistent with the results of most previous studies (Figure S7B). In the TCGA-CHOL cohort, patients whose ICC tumor tissues highly expressed PTPN22 and ADAMTS6 showed prolonged disease-free survival (Figure S7C).

Our study has several limitations. Although the current sample size was sufficient to identify the immunogenic Asian ICC, due to its limited size, our results require future validation with a larger cohort to establish the ICC subgroups. Because the purification of exosomal RNA from the plasma was elaborate, some plasma samples matched with the tissue samples were not sequenced (Figure 1A).

In summary, this pilot study revealed a subgroup of immunogenic Asian ICC characterized by T cell exhaustion and neutrophil extracellular traps and marked by an elevated abundance of circ-PTPN22 and circ-ADAMTS6 in plasma exosomes. This subgroup of patients with ICC is potentially detectable by plasma exosomal circRNAs and treatable with immune checkpoint blockade.

## MATERIALS AND METHODS

### Patient recruitment and sample collection

This study was approved by the Ethics Committee of Peking Union Medical Hospital (northern China) and Hunan Provincial People's Hospital (southern China). Surgically resected tumor tissues and adjacent normal tissues and plasma exosomes extracted from peripheral blood were donated by 14 patients (n = 7 from northern

### Figure 3. Potential circRNA biomarkers of the immunogenic Asian ICC subgroup

(A) PCA of the circRNA profile in ICC tumor tissues and adjacent normal tissues, labeled by subgroups. (B) PCA of the circRNA profile in plasma exosomes of ICC tumor tissues and healthy controls (provided by ExoRbase). (C) Top differential circRNAs in subgroup 2 versus subgroup 3 and adjacent normal tissues. (D) Top differential circRNAs in plasma exosomes of subgroup 2 versus healthy controls. (E) The abundance of circ-ADAMTS6, circ-PTPN22, and CDR1as in subgroups 2 and 3, and adjacent normal tissues. (F) Expression levels of ADAMTS6 and PTPN22 in subgroups 2 and 3, and adjacent normal tissues. (G) The abundance of circ-ADAMTS6, circ-PTPN22, and CDR1as in plasma exosomes of subgroup 2 and healthy controls.

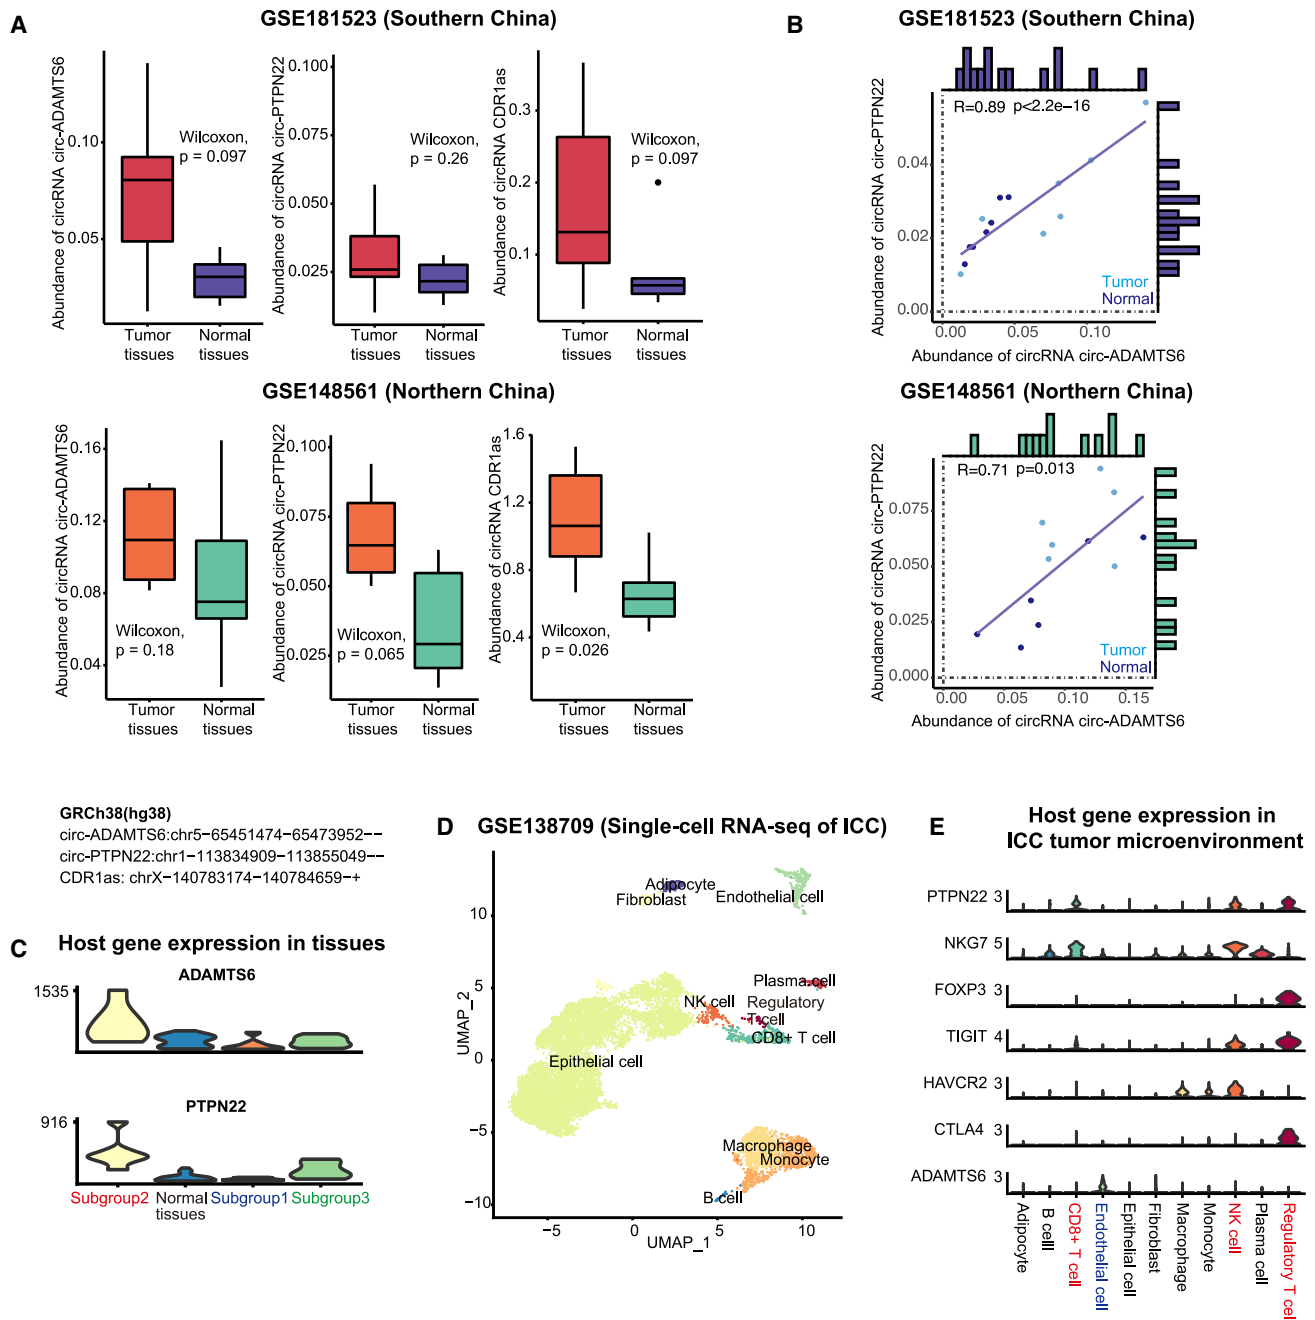

**Figure 4. Validation of circRNA biomarkers and host genes in Asian ICC tumor tissues collected by independent studies**

(A) Abundance of circ-ADAMTS6, circ-PTPN22, and CDR1as in the ICC tumor tissues and adjacent tumor tissues collected by the GSE181523 (southern China) dataset and the GSE148561 (northern China) dataset. (B) Correlation between the abundance of circ-ADAMTS6 and circ-PTPN22 in ICC tumor tissues and adjacent normal tissues collected by the GSE181523 and GSE148561. (C) Expression of ADAMTS6 and PTPN22 in subgroups 1, 2, and 3, and adjacent normal tissues. (D) UMAP embedding of the single-cell transcriptome of ICC tumor tissues. (E) Expression of PTPN22, ADAMTS6, and immune checkpoint genes in different cell types.

China,  $n = 7$  from southern China) who provided informed consent. Pathology departments confirmed the diagnoses made in the Peking Union Medical Hospital and Hunan Provincial People's Hospital.

#### Extraction and characterization of plasma exosomes

Plasma exosomes were isolated using a Microfuge 20R (Beckman, Brea, CA, USA) and an Ultracentrifuge CP100MX (Hitachi, Tokyo, Japan) at  $2000 \times g$  for 30 min,  $10,000 \times g$  for 45 min,



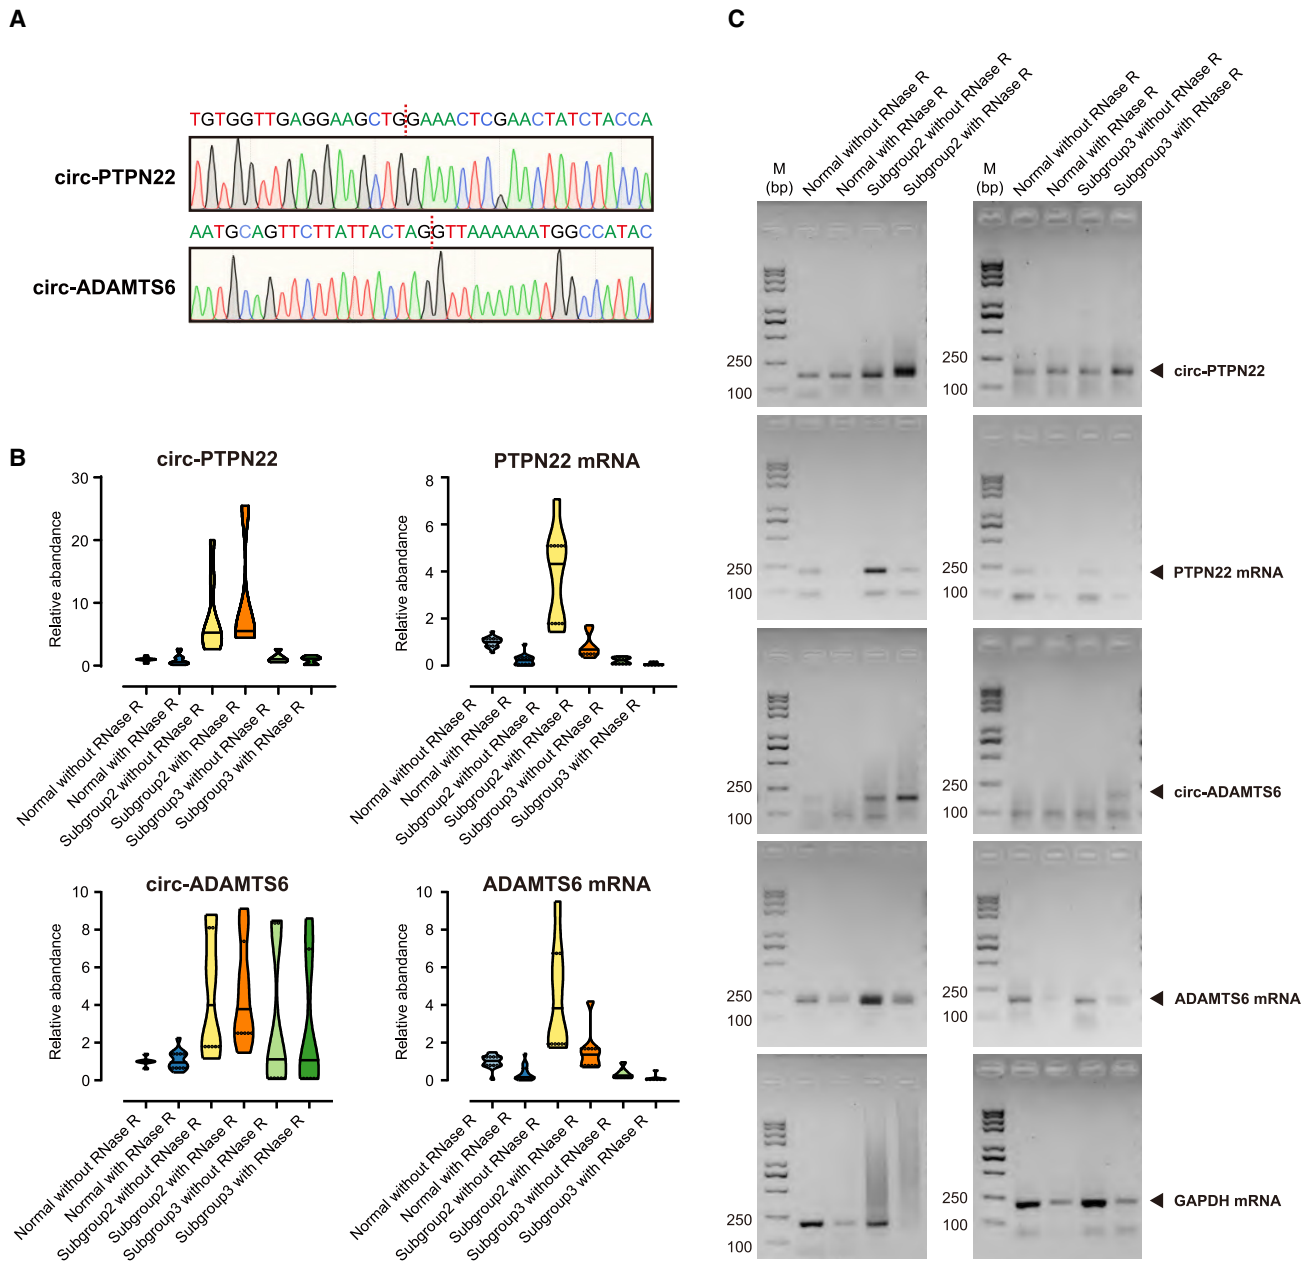

**Figure 5. Quantitative RT-PCR analysis of circRNA biomarkers and host genes in Asian ICC tumor tissues**

(A) Sanger sequencing of the PCR product of circ-PTPN22 and circ-ADAMTS6. Red dotted lines indicate the junction site of backsplicing. (B) qRT-PCR analysis of PTPN22 mRNA, ADAMTS6 mRNA, circ-PTPN22, and circ-ADAMTS6 abundance in ICC subgroups and adjacent normal tissues. (C) Agarose gel electrophoresis of the PCR product of PTPN22 mRNA, ADAMTS6 mRNA, circ-PTPN22, and circ-ADAMTS6.

100,000 × g for 70 min, and then 100,000 × g for 70 min at 4°C. Transmission electron microscopy HT-7700 (Hitachi, Tokyo, Japan) was used to observe the plasma exosomes identified by negative staining with phosphotungstic acid. Size distribution analysis of plasma exosomes was performed using a high-sensitivity flow cytometry N30E (NanoFCM, Xiamen, China) The side scattering (SSC) distribution histogram of the

mixture was converted into its corresponding vesicle size. For western blotting, we used a 10-μg sample for each lane and the 293T cells as the control. The following antibodies were used: anti-calnexin (12186, 1:1,000) (Santa Cruz Biotechnology, Dallas, TX, USA), anti-CD63 (ab134045, 1:1,000) (Abcam, Cambridge, UK), and anti-TSG101 (ab125011, 1:1,000) (Abcam, Cambridge, UK). Peroxidase conjugated goat anti-rabbit IgG

(Merck Millipore, Burlington, NJ, USA) was used as the secondary antibody and the western blot membrane was imaged using a ChemiScope 3000 Mini system (CLINX, Shanghai, China).

#### High-throughput RNA-seq

Total RNA from the tissue and plasma exosome samples was extracted using the TRIzol reagent (Invitrogen, Carlsbad, CA, USA), and those with an RIN value > 7 were used for library preparation. Next-generation sequencing libraries were prepared using the NEBNext Ultra Directional RNA Library Prep Kit for Illumina (New England Biolabs, Ipswich, MA, USA). rRNA was depleted from total RNA using the Ribo-Zero rRNA Removal Kit (Illumina, San Diego, CA, USA). The rRNA-depleted RNA was fragmented and reverse transcribed. First-strand cDNA was synthesized using ProtoScript II Reverse Transcriptase with random primers and actinomycin D (New England Biolabs, Ipswich, MA, USA). Second-strand cDNA was synthesized using the Second Strand Synthesis Enzyme Mix, including dACG-TP/dUTP (New England Biolabs, Ipswich, MA, USA). The double-stranded cDNA was purified by the AxyPrep Mag PCR Clean-up kit (Axygen, Union City, CA, USA) and then treated with End Prep Enzyme Mix (Illumina, San Diego, CA, USA). Size selection of adaptor-ligated DNA was then performed by the AxyPrep Mag PCR Clean-up kit (Axygen, Union City, CA, USA), and fragments of ~360 base pairs (bp) (with an approximate insert size of 300 bp) were recovered. The dUTP-marked second strand was digested with the Uracil-Specific Excision Reagent (USER) enzyme (New England Biolabs). Each sample was amplified by PCR for 14 cycles using P5 and P7 primers and then cleaned up by the AxyPrep Mag PCR Clean-up kit (Axygen, Union City, CA, USA). Libraries with different indices were multiplexed and loaded on the Illumina NovaSeq 6000 system (Illumina).

#### RNA extraction, qRT-PCR, and Sanger sequencing

Total RNA was isolated using TRIzol (Invitrogen) with DNase I treatment, and the extracted RNA was dissolved in 80  $\mu$ L RNase-free distilled water and stored at  $-80^{\circ}\text{C}$ . DNase I-treated RNA (~5  $\mu$ g) was treated for 30 min at  $37^{\circ}\text{C}$  with or without 3 U/ $\mu$ g of RNase R (Epicentre, Charlotte, NC, USA), and 1  $\mu$ L RNase R-treated RNA was directly reverse transcribed using an MMLV Reverse Transcriptase 1st-Strand cDNA Synthesis Kit with a random hexamer primer (Invitrogen) according to the manufacturer's protocol. The cDNA was diluted 10-fold before qRT-PCR analysis.

qRT-PCR experiments were performed in duplicate (technical replicates) using 2  $\times$  RealStar Green Fast Mixture (GenStar, Beijing, China) and a LightCycler 480 Real-Time PCR System (Roche, Basel, Switzerland). PCR program settings were  $95^{\circ}\text{C}$  for 10 min (initial denaturation);  $95^{\circ}\text{C}$  for 15 s, and  $60^{\circ}\text{C}$  for 1 min, for 45 cycles. Ct values were obtained by the second derivative maximum method and analyzed by the  $2^{-\Delta\Delta\text{Ct}}$  method.<sup>49</sup> PCR products were visualized after electrophoresis in 2% ExRed-stained (Zomanbio, Beijing, China) agarose gel, and purified through the V-ELUTE Gel Mini Purification

Kit (Zomanbio, Beijing, China). The pBLUE-T plasmid was constructed by the pBLUE-T fast cloning kit (Zomanbio, Beijing, China), and Sanger sequencing was performed.

#### DNA and RNA extraction, PCR, and Sanger sequencing

Total genomic DNA was extracted from tissues by DNA digestion buffer incubation (50 mM Tris-HCl pH 8.0, 100 mM EDTA pH 8.0, 100 mM NaCl, 1% SDS, 0.5 mg/mL proteinase K) overnight at  $65^{\circ}\text{C}$  with gentle shaking, and then treated with 10  $\mu$ g/mL RNase A (Zomanbio, Beijing, China) at  $37^{\circ}\text{C}$ . Total RNA was isolated using TRIzol (Invitrogen) with DNase I treatment. The cDNA library was total RNA directly reverse transcribed using an MMLV Reverse Transcriptase first-Strand cDNA Synthesis Kit with a random hexamer primer (Invitrogen). The negative control was total RNA not treated with MMLV Reverse Transcriptase.

PCR experiments were performed in duplicates using the TransStart FastPfu Fly polymerase (TransGen Biotech, Beijing, China). PCR program settings were  $95^{\circ}\text{C}$  for 5 min (initial denaturation);  $95^{\circ}\text{C}$  for 30 s,  $60^{\circ}\text{C}$  for 30 s, and  $72^{\circ}\text{C}$  for 30 s, for 45 cycles. PCR products were visualized after electrophoresis in 2% ExRed-stained (Zomanbio, Beijing, China) agarose gel, and purified through the V-ELUTE Gel Mini Purification Kit (Zomanbio, Beijing, China). The pBLUE-T plasmid was constructed using the pBLUE-T fast cloning kit (Zomanbio, Beijing, China), and Sanger sequencing was performed.

#### TCGA-CHOL RNA-seq datasets

We downloaded the RNA-seq data of Caucasian ICC samples from TCGA. We selected Caucasian patients with ICC, whose primary cancer sites were the liver and intrahepatic bile ducts, and from whom both ICC tumor tissues and adjacent normal tissues could be obtained (TCGA.W5.AA34, TCGA.W5.AA2Q, TCGA.W5.AA30, TCGA.W5.AA2U, TCGA.W5.AA2R, TCGA.W5.A8S4, TCGA.W5.AA31, and TCGA.WU.AA2I). Moreover, we used the GEPIA2 web server (<http://gepia2.cancer-pku.cn/#>) for survival analysis of the TCGA-CHOL cohort.<sup>50</sup>

#### ExoRbase and GEO circRNA datasets

We downloaded the raw fastq data of the RNA-seq of plasma exosomes collected by exoRbase<sup>51</sup> (<http://www.exorbase.org/>) from the Sequence Read Archive database. We included all 32 healthy controls from the research in China. These data were processed using the same pipeline processing for ICC sample data. We also collected the circRNA microarray data of ICC tumor tissues from two public datasets (GEO accession number: GSE181523 and GSE148561).<sup>31,32</sup>

#### Gene expression analysis

We adopted the identical mRNA analysis pipeline used by TCGA ([https://docs.gdc.cancer.gov/Data/Bioinformatics\\_Pipelines/Expression\\_mRNA\\_Pipeline/](https://docs.gdc.cancer.gov/Data/Bioinformatics_Pipelines/Expression_mRNA_Pipeline/)). We used fastp<sup>52</sup> for quality control and trimming of raw RNA-seq data. STAR<sup>53</sup> was used to map the reads to the human genome (GRCh38 reference genome and Gencode v22 annotation), and HTSeq-count<sup>54</sup> was used to quantify the mapped reads. DESeq2<sup>55</sup> package was used to normalize gene

expression and estimate the significance of differentially expressed genes in tumor tissues. The thresholds of significance were a log 2-fold change  $\geq 2$  or  $\leq -2$ , and an adjusted p value  $\leq 0.05$  (Wald test).

#### circRNA expression analysis

Our pipeline combined four top-cited circRNA prediction algorithms (circRNA\_finder,<sup>22</sup> find\_circ,<sup>23</sup> Circexplorer,<sup>24</sup> and CIRI2<sup>25</sup>) using the default parameters. We retained the circRNAs predicted by  $\geq 2$  among these four circRNA prediction algorithms. Subsequently, we averaged the backsplicing junction reads generated by the different algorithms. Any circRNA with an average raw count  $>1,000$  was removed. The circRNA nomenclature provides information on the chromosome, the two backsplicing sites, and strandness; for example, “chr1\_113834909\_113855049\_-” (hg38, aka GRCh38 reference genome).

The circRNA profile was of high dimensionality and sparsity, a feature selection was necessary before normalization and differential analysis. Any circRNA expressed in less than two samples was removed. The circRNA profile was log normalized, and subjected to variable selection, principal-component analysis, and differential expression analysis to find the upregulated circRNAs in each ICC subgroup, adjacent normal tissues, and plasma exosomes from patients with ICC or healthy controls.

#### Immune infiltration prediction

We used multiple algorithms to infer the immune infiltration of tumor tissues, which included ImmuCellAI,<sup>27</sup> xCell,<sup>28</sup> quanTIseq,<sup>29</sup> and TIMER.<sup>30</sup> We adopted the results supported by  $\geq 2$  among these four algorithms.

#### Single-cell transcriptomic analysis

We collected the single-cell RNA-seq data of ICC tumor tissues from a public dataset (GEO accession number: GSE138709).<sup>33</sup> Harmony<sup>56</sup> was used to integrate the single-cell transcriptome of ICC tumor tissues from five patients. Cell types were determined based on marker gene expression and SingleR,<sup>57</sup> a machine learning-based pipeline.

#### Statistical analysis

The R software (version 4.0.3) was used to conduct statistical analysis and visualization. All reported p values were two-sided with 0.05 as the threshold of significance.

#### AVAILABILITY OF DATA AND MATERIALS

The circRNA and mRNA datasets generated in this study will be available in the GEO repository (GEO accession number: GSE188330) and SRA (BioProject accession number: PRJNA777408) upon publication. The circRNA prediction algorithms ([https://github.com/Selecton98/CircRNA\\_4DGLab2](https://github.com/Selecton98/CircRNA_4DGLab2)) and the Jupyter notebooks ([https://github.com/Selecton98/CircRNA\\_ICC](https://github.com/Selecton98/CircRNA_ICC)) are available in the GitHub repository.

#### SUPPLEMENTAL INFORMATION

Supplemental information can be found online at <https://doi.org/10.1016/j.omtn.2022.12.012>.

#### ACKNOWLEDGMENTS

This study was supported by grants from the National High Level Hospital Clinical Research Funding (2022-PUMCH-A-236), CAMS Innovation Fund for Medical Sciences (CIFMS) (2020-I2M-C&T-B-019), Beijing Municipal Natural Science Foundation Project (Grant No. 7222130), Chen Xiao Ping Foundation for the Development of Science and Technology of Hubei Province (CXPJH1200008-10), and Beijing Undergraduate Training Programs for Innovation and Entrepreneurship (202010023046).

#### AUTHOR CONTRIBUTIONS

X.W. managed the team, analyzed the data, and drafted the manuscript; G.W. designed and conducted the experiments; Y.D. improved the data analysis and revised the manuscript; Z.W. and Y.S. collected and sequenced the clinical samples; F.Y., X.C., and S.D. contributed to sample collection; Y.Z., H.X., and J.W. conceptualized the project and revised the manuscript. All authors read and approved the final manuscript.

#### DECLARATION OF INTERESTS

The authors declare no competing interests.

#### REFERENCES

1. Shaib, Y., and El-Serag, H.B. (2004). The epidemiology of cholangiocarcinoma. *Semin. Liver Dis.* 24, 115–125.
2. Moeni, A., Sia, D., Bardeesy, N., Mazzaferro, V., and Llovet, J.M. (2016). Molecular pathogenesis and targeted therapies for intrahepatic cholangiocarcinoma. *Clin. Cancer Res.* 22, 291–300.
3. Dodson, R.M., Weiss, M.J., Cosgrove, D., Herman, J.M., Kamel, I., Anders, R., Geschwind, J.F.H., and Pawlik, T.M. (2013). Intrahepatic cholangiocarcinoma: management options and emerging therapies. *J. Am. Coll. Surg.* 217, 736–750.e4.
4. Zhang, H., Yang, T., Wu, M., and Shen, F. (2016). Intrahepatic cholangiocarcinoma: epidemiology, risk factors, diagnosis and surgical management. *Cancer Lett.* 379, 198–205.
5. Cao, J., Hu, J., Liu, S., Meric-Bernstam, F., Abdel-Wahab, R., Xu, J., Li, Q., Yan, M., Feng, Y., Lin, J., et al. (2020). Intrahepatic cholangiocarcinoma: genomic heterogeneity between eastern and western patients. *JCO Precis. Oncol.* 4.
6. Chaisaingmongkol, J., Budhu, A., Dang, H., Rabibhadana, S., Pupacdi, B., Kwon, S.M., Forgues, M., Pomyen, Y., Bhudhisawasdi, V., Lertprasertsuke, N., et al. (2017). Common molecular subtypes among asian hepatocellular carcinoma and cholangiocarcinoma. *Cancer Cell* 32, 57–70.e3.
7. Loeuillard, E., Conboy, C.B., Gores, G.J., and Rizvi, S. (2019). Immunobiology of cholangiocarcinoma. *JHEP Rep.* 1, 297–311.
8. Job, S., Rapoud, D., Dos Santos, A., Gonzalez, P., Desterke, C., Pascal, G., Elarouci, N., Ayadi, M., Adam, R., Azoulay, D., et al. (2020). Identification of four immune subtypes characterized by distinct composition and functions of tumor microenvironment in intrahepatic cholangiocarcinoma. *Hepatology* 72, 965–981.
9. Jusakul, A., Cutcutache, I., Yong, C.H., Lim, J.Q., Huang, M.N., Padmanabhan, N., Nellore, V., Kongpetch, S., Ng, A.W.T., Ng, L.M., et al. (2017). Whole-genome and epigenomic landscapes of etiologically distinct subtypes of cholangiocarcinoma. *Cancer Discov.* 7, 1116–1135.
10. Guo, Z., Cao, Q., Zhao, Z., and Song, C. (2020). Biogenesis, features, functions, and disease relationships of a specific circular RNA: CDR1as. *Aging Dis.* 11, 1009–1020.
11. Jiang, X.M., Li, Z.L., Li, J.L., Xu, Y., Leng, K.M., Cui, Y.F., and Sun, D.J. (2018). A novel prognostic biomarker for cholangiocarcinoma: circRNA Cdr1as. *Eur. Rev. Med. Pharmacol. Sci.* 22, 365–371.
12. Xu, Y., Yao, Y., Liu, Y., Wang, Z., Hu, Z., Su, Z., Li, C., Wang, H., Jiang, X., Kang, P., et al. (2019). Elevation of circular RNA circ\_0005230 facilitates cell growth and metastasis via sponging miR-1238 and miR-1299 in cholangiocarcinoma. *Aging* 11, 1907–1917.

13. Su, Y., Yu, T., Wang, Y., Huang, X., and Wei, X. (2021). Circular RNA circDNM3OS functions as a miR-145-5p sponge to accelerate cholangiocarcinoma growth and glutamine metabolism by upregulating MORC2. *Oncotargets Ther.* *14*, 1117–1129.
14. Xu, Y., Gao, P., Wang, Z., Su, Z., Liao, G., Han, Y., Cui, Y., Yao, Y., and Zhong, X. (2021). Circ-LAMP1 contributes to the growth and metastasis of cholangiocarcinoma via miR-556-5p and miR-567 mediated YY1 activation. *J. Cell Mol. Med.* *25*, 3226–3238.
15. Tu, J., Chen, W., Zheng, L., Fang, S., Zhang, D., Kong, C., Yang, Y., Qiu, R., Zhao, Z., Lu, C., et al. (2021). Circular RNA Circ0021205 promotes cholangiocarcinoma progression through MiR-204-5p/RAB22A Axis. *Front. Cell Dev. Biol.* *9*, 653207.
16. Tang, J., Wang, R., Tang, R., Gu, P., Han, J., and Huang, W. (2022). CircRTN4IP1 regulates the malignant progression of intrahepatic cholangiocarcinoma by sponging miR-541-5p to induce HIF1A production. *Pathol. Res. Pract.* *230*, 153732.
17. Xiong, W., Zhang, A., Xiao, X., and Liu, W. (2022). CircSETD3 (hsa\_circ\_0000567) inhibits proliferation and induces apoptosis in cholangiocarcinoma cells via downregulation of microRNA-421 expression. *Bioengineered* *13*, 10191–10201.
18. Chen, S., Chen, Z., Li, Z., Li, S., Wen, Z., Cao, L., Chen, Y., Xue, P., Li, H., and Zhang, D. (2022). Tumor-associated macrophages promote cholangiocarcinoma progression via exosomal Circ\_0020256. *Cell Death Dis.* *13*, 94.
19. Xu, Y., Leng, K., Yao, Y., Kang, P., Liao, G., Han, Y., Shi, G., Ji, D., Huang, P., Zheng, W., et al. (2021). A circular RNA, cholangiocarcinoma-associated circular RNA 1, contributes to cholangiocarcinoma progression, induces angiogenesis, and disrupts vascular endothelial barriers. *Hepatology* *73*, 1419–1435.
20. Wang, S., Hu, Y., Lv, X., Li, B., Gu, D., Li, Y., Sun, Y., and Su, Y. (2019). Circ-0000284 arouses malignant phenotype of cholangiocarcinoma cells and regulates the biological functions of peripheral cells through cellular communication. *Clin. Sci.* *133*, 1935–1953.
21. Hansen, T.B. (2018). Improved circRNA identification by combining prediction algorithms. *Front. Cell Dev. Biol.* *6*, 20.
22. Westholm, J.O., Miura, P., Olson, S., Shenker, S., Joseph, B., Sanfilippo, P., Celniker, S.E., Graveley, B.R., and Lai, E.C. (2014). Genome-wide analysis of drosophila circular RNAs reveals their structural and sequence properties and age-dependent neural accumulation. *Cell Rep.* *9*, 1966–1980.
23. Memczak, S., Jens, M., Elefsinioti, A., Torti, F., Krueger, J., Rybak, A., Maier, L., Mackowiak, S.D., Gregersen, L.H., Munschauer, M., et al. (2013). Circular RNAs are a large class of animal RNAs with regulatory potency. *Nature* *495*, 333–338.
24. Zhang, X.O., Wang, H.B., Zhang, Y., Lu, X., Chen, L.L., and Yang, L. (2014). Complementary sequence-mediated exon circularization. *Cell* *159*, 134–147.
25. Gao, Y., Zhang, J., and Zhao, F. (2018). Circular RNA identification based on multiple seed matching. *Briefings Bioinf.* *19*, 803–810.
26. Wang, X., Dong, Y., Wu, Z., Wang, G., Shi, Y., and Zheng, Y. (2021). Machine learning-based comparative analysis of pan-cancer and pan-normal tissues identifies pan-cancer tissue-enriched circRNAs related to cancer mutations as potential exosomal biomarkers. *Front. Oncol.* *11*, 703461.
27. Miao, Y.R., Zhang, Q., Lei, Q., Luo, M., Xie, G.Y., Wang, H., and Guo, A.Y. (2020). ImmuCellAI: a unique method for comprehensive T-cell subsets abundance prediction and its application in cancer immunotherapy. *Adv. Sci.* *7*, 1902880.
28. Aran, D., Hu, Z., and Butte, A.J. (2017). xCell: digitally portraying the tissue cellular heterogeneity landscape. *Genome Biol.* *18*, 220.
29. Finotello, F., Mayer, C., Plattner, C., Laschober, G., Rieder, D., Hackl, H., Krogdram, A., Loncova, Z., Posch, W., Wilflingseder, D., et al. (2019). Molecular and pharmacological modulators of the tumor immune contexture revealed by deconvolution of RNA-seq data. *Genome Med.* *11*, 34.
30. Li, T., Fan, J., Wang, B., Traugh, N., Chen, Q., Liu, J.S., Li, B., and Liu, X.S. (2017). TIMER: a web server for comprehensive analysis of tumor-infiltrating immune cells. *Cancer Res.* *77*, e108–e110.
31. Chen, Q., Wang, H., Li, Z., Li, F., Liang, L., Zou, Y., Shen, H., Li, J., Xia, Y., Cheng, Z., et al. (2022). Circular RNA ACTN4 promotes intrahepatic cholangiocarcinoma progression by recruiting YBX1 to initiate FZD7 transcription. *J. Hepatol.* *76*, 135–147.
32. Zhao, X., Zhang, X., Zhang, Z., Liu, Z., Zhu, J., Lyu, S., Li, L., Lang, R., and He, Q. (2020). Comprehensive circular RNA expression profiling constructs a ceRNA network and identifies hsa\_circ\_0000673 as a novel oncogene in distal cholangiocarcinoma. *Aging* *12*, 23251–23274.
33. Zhang, M., Yang, H., Wan, L., Wang, Z., Wang, H., Ge, C., Liu, Y., Hao, Y., Zhang, D., Shi, G., et al. (2020). Single-cell transcriptomic architecture and intercellular crosstalk of human intrahepatic cholangiocarcinoma. *J. Hepatol.* *73*, 1118–1130.
34. Masucci, M.T., Minopoli, M., Del Vecchio, S., and Carriero, M.V. (2020). The emerging role of neutrophil extracellular traps (NETs) in tumor progression and metastasis. *Front. Immunol.* *11*, 1749.
35. Yang, D., and Liu, J. (2021). Neutrophil extracellular traps: a new player in cancer metastasis and therapeutic target. *J. Exp. Clin. Cancer Res.* *40*, 233.
36. Palacios-Acedo, A.L., Mège, D., Crescence, L., Dignat-George, F., Dubois, C., and Panicot-Dubois, L. (2019). Platelets, thrombo-inflammation, and cancer: collaborating with the enemy. *Front. Immunol.* *10*, 1805.
37. Wu, W., Zhang, J., Cao, X., Cai, Z., and Zhao, F. (2022). Exploring the cellular landscape of circular RNAs using full-length single-cell RNA sequencing. *Nat. Commun.* *13*, 3242.
38. Gregersen, P.K., Lee, H.S., Batliwalla, F., and Begovich, A.B. (2006). PTPN22: setting thresholds for autoimmunity. *Semin. Immunol.* *18*, 214–223.
39. Cubas, R., Khan, Z., Gong, Q., Moskalenko, M., Xiong, H., Ou, Q., Pai, C., Rodriguez, R., Cheung, J., and Chan, A.C. (2020). Autoimmunity linked protein phosphatase PTPN22 as a target for cancer immunotherapy. *J. Immunother. Cancer* *8*, e001439.
40. Ho, W.J., Croessmann, S., Lin, J., Phyo, Z.H., Charmsaz, S., Danilova, L., Mohan, A.A., Gross, N.E., Chen, F., Dong, J., et al. (2021). Systemic inhibition of PTPN22 augments anticancer immunity. *J. Clin. Invest.* *131*, e146950.
41. He, Y., Han, P., Chen, C., Xie, S., Zhang, H., Song, Y., Hu, H., Zhao, Q., and Lian, C. (2021). circPTPN22 attenuates immune microenvironment of pancreatic cancer via STAT3 acetylation. *Cancer Gene Ther.* <https://doi.org/10.1038/s41417-021-00382-w>.
42. Ma, S., Kong, S., Gu, X., Xu, Y., Tao, M., Shen, L., Shen, X., and Ju, S. (2021). As a biomarker for gastric cancer, circPTPN22 regulates the progression of gastric cancer through the EMT pathway. *Cancer Cell Int.* *21*, 44.
43. Jiang, Z., Zhong, Z., Miao, Q., Zhang, Y., Ni, B., Zhang, M., and Tang, J. (2021). circPTPN22 as a novel biomarker and ceRNA in peripheral blood mononuclear cells of rheumatoid arthritis. *Mol. Med. Rep.* *24*, 617.
44. Miao, Q., Zhong, Z., Jiang, Z., Lin, Y., Ni, B., Yang, W., and Tang, J. (2019). RNA-seq of circular RNAs identified circPTPN22 as a potential new activity indicator in systemic lupus erythematosus. *Lupus* *28*, 520–528.
45. Matevosyan, K., and Sarode, R. (2015). Thrombosis, microangiopathies, and inflammation. *Semin. Thromb. Hemost.* *41*, 556–562.
46. Binder, M.J., McCoombe, S., Williams, E.D., McCulloch, D.R., and Ward, A.C. (2017). The extracellular matrix in cancer progression: role of hyalacan proteoglycans and ADAMTS enzymes. *Cancer Lett.* *385*, 55–64.
47. Shen, L., Ji, C., Lin, J., and Yang, H. (2022). Regulation of circADAMTS6-miR-324-5p-PIK3R3 ceRNA pathway may be a novel mechanism of IL-1 $\beta$ -induced osteoarthritic chondrocytes. *J. Bone Miner. Metabol.* *40*, 389–401.
48. Fu, Q., Li, L., Wang, B., Wu, J., Li, H., Han, Y., Xiang, D., Chen, Y., and Zhu, J. (2021). CircADAMTS6/miR-431-5p axis regulate interleukin-1 $\beta$  induced chondrocyte apoptosis. *J. Gene Med.* *23*, e3304.
49. Livak, K.J., and Schmittgen, T.D. (2001). Analysis of relative gene expression data using real-time quantitative PCR and the 2<sup>(-Delta Delta C(T))</sup> Method. *Methods* *25*, 402–408.
50. Tang, Z., Kang, B., Li, C., Chen, T., and Zhang, Z. (2019). GEPIA2: an enhanced web server for large-scale expression profiling and interactive analysis. *Nucleic Acids Res.* *47*, W556–w560.
51. Li, S., Li, Y., Chen, B., Zhao, J., Yu, S., Tang, Y., Zheng, Q., Li, Y., Wang, P., He, X., and Huang, S. (2018). exoRBase: a database of circRNA, lncRNA and mRNA in human blood exosomes. *Nucleic Acids Res.* *46*, D106–d112.
52. Chen, S., Zhou, Y., Chen, Y., and Gu, J. (2018). fastp: an ultra-fast all-in-one FASTQ preprocessor. *Bioinformatics* *34*, i884–i890.
53. Dobin, A., Davis, C.A., Schlesinger, F., Drenkow, J., Zaleski, C., Jha, S., Batut, P., Chaisson, M., and Gingeras, T.R. (2013). STAR: ultrafast universal RNA-seq aligner. *Bioinformatics* *29*, 15–21.

54. Anders, S., Pyl, P.T., and Huber, W. (2015). HTSeq—a Python framework to work with high-throughput sequencing data. *Bioinformatics* *31*, 166–169.
55. Anders, S., and Huber, W. (2010). Differential expression analysis for sequence count data. *Genome Biol.* *11*, R106.
56. Korsunsky, I., Millard, N., Fan, J., Slowikowski, K., Zhang, F., Wei, K., Baglaenko, Y., Brenner, M., Loh, P.R., and Raychaudhuri, S. (2019). Fast, sensitive and accurate integration of single-cell data with Harmony. *Nat. Methods* *16*, 1289–1296.
57. Aran, D., Looney, A.P., Liu, L., Wu, E., Fong, V., Hsu, A., Chak, S., Naikawadi, R.P., Wolters, P.J., Abate, A.R., et al. (2019). Reference-based analysis of lung single-cell sequencing reveals a transitional profibrotic macrophage. *Nat. Immunol.* *20*, 163–172.

OMTN, Volume 31

## Supplemental information

**Exosomal circ-PTPN22 and circ-ADAMTS6 mark**

**T cell exhaustion and neutrophil extracellular**

**traps in Asian intrahepatic cholangiocarcinoma**

**Xuezhu Wang, Guanqun Wang, Zilong Wu, Yucheng Dong, Yue Shi, Fan Yang, Xinyu Chen, Jun Wang, Shunda Du, Haifeng Xu, and Yongchang Zheng**

**Table S1 Clinical data of the Asian ICC patient cohort.**

| <b>Subgroup</b> | <b>ID</b> | <b>Age</b> | <b>Sex</b> | <b>CA199</b> | <b>CA125</b> | <b>Differentiation</b> | <b>TNM</b> | <b>OP date</b> | <b>Lymph node</b> | <b>Recurrence (2021-08)</b> | <b>Metastases (2021-08)</b> | <b>Survival (2021-08)</b> |
|-----------------|-----------|------------|------------|--------------|--------------|------------------------|------------|----------------|-------------------|-----------------------------|-----------------------------|---------------------------|
| 1               | 2534465   | 72         | male       | 13.4         | NA           | NA                     | NA         | 2020/9/11      | none              | none                        | none                        | alive                     |
| 2               | 2537821   | 80         | male       | 66.1         | 20.8         | NA                     | T1N1M0     | 2020/9/18      | metastases        | none                        | none                        | alive                     |
| 2               | 2518780   | 59         | male       | NA           | NA           | NA                     | NA         | 2019/12/2      | none              | none                        | none                        | alive                     |
| 2               | 2287602   | 68         | female     | 2907         | 80           | G1                     | T4N1M1     | 2018/12/14     | none              | NA                          | NA                          | NA                        |
| 2               | 1         | 66         | male       | 1.73         | 6.48         | G2                     | T1bN0M0    | 2020/1/11      | none              | recurrent (2021/4/28)       | intrahepatic and lymph      | alive                     |
| 2               | 2         | 53         | male       | 1592.4       | 8.52         | G3                     | T2N0M0     | 2020/1/16      | metastases        | recurrent (2021/1/13)       | intrahepatic and lung       | alive                     |
| 2               | 5         | 63         | female     | 1988.1       | 1112.68      | G3                     | T3N1M0     | 2020/12/17     | metastases        | recurrent (2021/3/5)        | intrahepatic                | deceased (2021/6/1)       |

|   |         |    |        |        |        |    |         |           |            |                        |                        |                       |
|---|---------|----|--------|--------|--------|----|---------|-----------|------------|------------------------|------------------------|-----------------------|
| 2 | 7       | 51 | male   | 18.15  | 100.81 | G3 | T1bN1M0 | 2021/1/7  | metastases | none                   | none                   | alive                 |
| 3 | 2520263 | 65 | female | 146.9  | 277.5  | Gx | NA      | 2019/1/18 | metastases | recurrent (2019/12/17) | intrahepatic and lymph | deceased (2019/12/26) |
| 3 | 2523247 | 67 | male   | 21.8   | NA     | G3 | T3N0M0  | 2019/1/29 | metastases | NA                     | NA                     | NA                    |
| 3 | 2393116 | 60 | female | 119.5  | NA     | NA | T1N0M0  | 2019/3/15 | none       | none                   | none                   | alive                 |
| 3 | 3       | 74 | male   | 154.41 | 12.86  | G3 | T3N1M0  | 2020/1/18 | none       | NA                     | NA                     | NA                    |
| 3 | 4       | 66 | female | 44.55  | 4.76   | G3 | T1bN0M0 | 2020/1/23 | none       | recurrent (2021/7/7)   | intrahepatic           | alive                 |
| 3 | 6       | 75 | female | 510.11 | 157.05 | G3 | T1bN0M0 | 2020/1/29 | none       | recurrent (2021/3/1)   | intrahepatic           | deceased (2021/6/1)   |



**Table S2 Mean size and concentration of exosomes.**

|          | <b>Mean size of exosomes (nm)</b> | <b>Concentration of exosomes (Particles/mL)</b> |
|----------|-----------------------------------|-------------------------------------------------|
| <b>1</b> | 76.63                             | 5.32E+8                                         |
| <b>2</b> | 80.48                             | 5.02E+8                                         |
| <b>3</b> | 78.44                             | 9.81E+8                                         |
| <b>4</b> | 76.97                             | 7.22E+8                                         |
| <b>5</b> | 79.29                             | 1.23E9                                          |

**Table S3 Raw data of the size of exosomes.**

These data are too big to be presented in this document.

Please find the supplemental file “TableS3.xlsx”.

**Table S4 circRNAs reported by recent publications.**

| <b>circRNA</b> | <b>Host gene</b> | <b>Microarray probe</b> | <b>ID in circBase (hg19)</b> | <b>ID in this study (hg38)</b> |
|----------------|------------------|-------------------------|------------------------------|--------------------------------|
| circ-PTPN22    | PTPN22           | ASCRP3004050            | chr1:114377531-114397671     | chr1-113834909-113855049--     |
| circ-ADAMTS6   | ADAMTS6          | ASCRP3001689            | chr5:64747301-64769779       | chr5-65451474-65473952--       |
| CDR1as         | CDR1             | ASCRP3010297            | chrX:139865339-139866824     | chrX-140783174-140784659-+     |
| circ-0000284   | HIPK3            | ASCRP3002878            | chr11:33307958-33309057      | chr11-33286412-33287511-+      |
| circ_0005230   | DNM3OS           | ASCRP3013585            | chr1:172109619-172113577     | chr1-172140479-172144437--     |
| circRTN4IP1    | RTN4IP1          | ASCRP3013332            | chr6:107031202-107050797     | chr6-106583327-106602922--     |
| circSETD3      | SETD3            | ASCRP3002403            | chr14:99924615-99932150      | chr14-99458278-99465813--      |
| circ_0020256   | NSMCE4A          | ASCRP3009181            | chr10:123718838-123721032    | chr10-121959323-121961517--    |
| circ-CCAC1     | ERBB2            | ASCRP3004665            | chr17:37880978-37882106      | chr17-39724725-39725853-+      |
| circ-LAMP1     | LAMP1            | ASCRP3013337            | chr13:113963957-113964177    | Not captured                   |
| circ0021205    | WEE1             | Not captured            | chr11:9597776-9611313        | Not captured                   |

**Table S5 Primer sequences used for RT-qPCR validation.**

|                     | <b>Forward</b>            | <b>Reverse</b>           |
|---------------------|---------------------------|--------------------------|
| <b>circ-PTPN22</b>  | CCTGTATGGACACCTGAATCATT   | AACACTGTCATCCTCTTGGTAAC  |
| <b>circ-ADAMTS6</b> | ATTGCCACACCACGATAATGC     | TCCACTGTTTAAGAGCCACTTT   |
| <b>GAPDH mRNA</b>   | AGGGCTGCTTTTAACTCTGGT     | CCCCACTTGATTTTGGAGGGA    |
| <b>PTPN22 mRNA</b>  | CCTACAACCTGTGGCTGAGAA     | AATCATCCTCCAGAAGTCCAG    |
| <b>ADAMTS6 mRNA</b> | GCCGTGGTACTTGCCTTGATAATGA | GCTGCTGGAATACTGTTGGTGACA |

**Table S6 Raw data of RT-qPCR results.**

**circ-PTPN22**

| <b>Normal without RNase R</b> | <b>Normal with RNase R</b> | <b>Subgroup2 without RNase R</b> | <b>Subgroup2 with RNase R</b> | <b>Subgroup3 without RNase R</b> | <b>Subgroup3 with RNase R</b> |
|-------------------------------|----------------------------|----------------------------------|-------------------------------|----------------------------------|-------------------------------|
| 0.845106                      | 1.441134                   | 20.05075                         | 25.43529                      | 0.700863                         | 1.344626                      |
| 1.154449                      | 0.29062                    | 13.6552                          | 25.51818                      | 0.534849                         | 1.033261                      |
| 0.946118                      | 0.837579                   | 4.299362                         | 4.770441                      | 1.525517                         | 0.138629                      |
| 1.053882                      | 2.719574                   | 6.426898                         | 7.967475                      | 2.656079                         | 0.202964                      |
| 0.359515                      | 2.368745                   | 3.103428                         | 4.48113                       | 0.944842                         | 1.19594                       |
| 1.640485                      | 0.415846                   | 2.627813                         | 4.450176                      | 1.100489                         | 1.691315                      |
| 1.031182                      | 0.138149                   | 4.12041                          | 5.94958                       |                                  |                               |
| 0.968818                      | 0.144016                   | 6.202233                         | 5.072819                      |                                  |                               |
| 0.557926                      | 0.419908                   |                                  |                               |                                  |                               |
| 1.442074                      | 0.557926                   |                                  |                               |                                  |                               |
| 0.961836                      | 0.51902                    |                                  |                               |                                  |                               |
| 1.03804                       | 0.445613                   |                                  |                               |                                  |                               |
| 1.077575                      | 1.246418                   |                                  |                               |                                  |                               |
| 0.925168                      | 1.246418                   |                                  |                               |                                  |                               |
| 1.191569                      | 1.346145                   |                                  |                               |                                  |                               |
| 1.000147                      | 0.579919                   |                                  |                               |                                  |                               |

**circ-ADAMTS6**

| <b>Normal without RNase R</b> | <b>Normal with RNase R</b> | <b>Subgroup2 without RNase R</b> | <b>Subgroup2 with RNase R</b> | <b>Subgroup3 without RNase R</b> | <b>Subgroup3 with RNase R</b> |
|-------------------------------|----------------------------|----------------------------------|-------------------------------|----------------------------------|-------------------------------|
| 0.943123                      | 1.364224                   | 8.726059                         | 7.969826                      | 1.182231                         | 0.698103                      |
| 1.056877                      | 2.254259                   | 8.801042                         | 9.129387                      | 1.050817                         | 1.445443                      |
| 1.027719                      | 1.453414                   | 6.230922                         | 4.624975                      | 0.077636                         | 0.081495                      |
| 0.972281                      | 1.291856                   | 5.462061                         | 5.615621                      | 0.125248                         | 0.103871                      |
| 0.651353                      | 1.570813                   | 2.523608                         | 2.595477                      | 8.485361                         | 8.603812                      |
| 1.348646                      | 1.386562                   | 1.817002                         | 2.942166                      | 8.310735                         | 6.430701                      |
| 1.058817                      | 0.571352                   | 1.16053                          | 1.468948                      |                                  |                               |
| 0.941121                      | 0.79689                    | 1.783589                         | 2.470466                      |                                  |                               |
| 0.592028                      | 0.418237                   |                                  |                               |                                  |                               |
| 1.407981                      | 0.875565                   |                                  |                               |                                  |                               |
| 0.982673                      | 0.576257                   |                                  |                               |                                  |                               |
| 1.017327                      | 0.832074                   |                                  |                               |                                  |                               |
| 1.006939                      | 1.013943                   |                                  |                               |                                  |                               |
| 0.993076                      | 0.683009                   |                                  |                               |                                  |                               |

**PTPN22 mRNA**

| <b>Normal without RNase R</b> | <b>Normal with RNase R</b> | <b>Subgroup2 without RNase R</b> | <b>Subgroup2 with RNase R</b> | <b>Subgroup3 without RNase R</b> | <b>Subgroup3 with RNase R</b> |
|-------------------------------|----------------------------|----------------------------------|-------------------------------|----------------------------------|-------------------------------|
| 0.768768                      | 0.096706                   | 1.678219                         | 0.340603                      | 0.081923                         | 0.033271                      |
| 1.09308                       | 0.003395                   | 1.431785                         | 0.491162                      | 0.072313                         | 0.029166                      |
| 1.138397                      | 0.058775                   | 5.010523                         | 0.704641                      | 0.404878                         | 0.051294                      |
| 1.006928                      | 0.341501                   | 5.115805                         | 0.771085                      | 0.323635                         | 0.044876                      |
| 0.993066                      | 0.371121                   | 3.740912                         | 0.506486                      | 0.302513                         | 0.138223                      |
| 1.064369                      | 0.926587                   | 2.108741                         | 0.666247                      | 0.15659                          | 0.174956                      |
| 0.999999                      | 0.414659                   | 4.899345                         | 1.720215                      |                                  |                               |
| 1.145082                      | 0.32949                    | 7.074308                         | 1.561128                      |                                  |                               |
| 0.854918                      | 0.295519                   |                                  |                               |                                  |                               |
| 0.543625                      | 0.237907                   |                                  |                               |                                  |                               |
| 1.463722                      | 0.2325                     |                                  |                               |                                  |                               |
| 1.226943                      | 0.019574                   |                                  |                               |                                  |                               |
| 0.776505                      | 0.019574                   |                                  |                               |                                  |                               |
| 0.82507                       | 0.145853                   |                                  |                               |                                  |                               |
| 1.174942                      | 0.142852                   |                                  |                               |                                  |                               |

**ADAMTS6 mRNA**

| <b>Normal without RNase R</b> | <b>Normal with RNase R</b> | <b>Subgroup2 without RNase R</b> | <b>Subgroup2 with RNase R</b> | <b>Subgroup3 without RNase R</b> | <b>Subgroup3 with RNase R</b> |
|-------------------------------|----------------------------|----------------------------------|-------------------------------|----------------------------------|-------------------------------|
| 1.498709                      | 0.632992                   | 2.764976                         | 0.715304                      | 0.963277                         | 0.072094                      |
| 1.468477                      | 0.415847                   | 1.883026                         | 0.700918                      | 0.172662                         | 0.071596                      |
| 0.032463                      | 0.00668                    | 2.06218                          | 1.184411                      | 0.126477                         | 0.050658                      |
| 1.034669                      | 0.079614                   | 1.734079                         | 0.97547                       | 0.190379                         | 0.053547                      |
| 0.965381                      | 0.072251                   | 5.771718                         | 4.196801                      | 0.470508                         | 0.083555                      |
| 1.24454                       | 0.82109                    | 9.503187                         | 1.548238                      | 0.31006                          | 0.532809                      |
| 0.755557                      | 0.380406                   | 4.899345                         | 1.720215                      |                                  |                               |
| 1.243377                      | 0.903985                   | 7.074308                         | 1.561128                      |                                  |                               |
| 0.756623                      | 1.416929                   |                                  |                               |                                  |                               |
| 0.82507                       | 0.145853                   |                                  |                               |                                  |                               |
| 1.174942                      | 0.142852                   |                                  |                               |                                  |                               |
| 0.788371                      | 0.109344                   |                                  |                               |                                  |                               |
| 1.211628                      | 0.157885                   |                                  |                               |                                  |                               |
| 1.139589                      | 0.153589                   |                                  |                               |                                  |                               |
| 0.860392                      | 0.167761                   |                                  |                               |                                  |                               |

**Table S7 Primer sequences used PCR analysis.**

|                           | <b>Forward</b>            | <b>Reverse</b>           |
|---------------------------|---------------------------|--------------------------|
| <b>circ-PTPN22 primer</b> | TACCAAAAAGCAACTGCTCCA     | ACAACGTACATCCCAGATGAGC   |
| <b>circ-ADAMTS6</b>       | ATTGCCACACCACGATAATGC     | TCCACTGTTTAAGAGCCACTTT   |
| <b>PTPN22 mRNA</b>        | CCTACAACCTGTGGCTGAGAA     | AATCATCCTCCAGAAGTCCAG    |
| <b>ADAMTS6 mRNA</b>       | GCCGTGGTACTTGCCTTGATAATGA | GCTGCTGGAATACTGTTGGTGACA |

Fig. S1

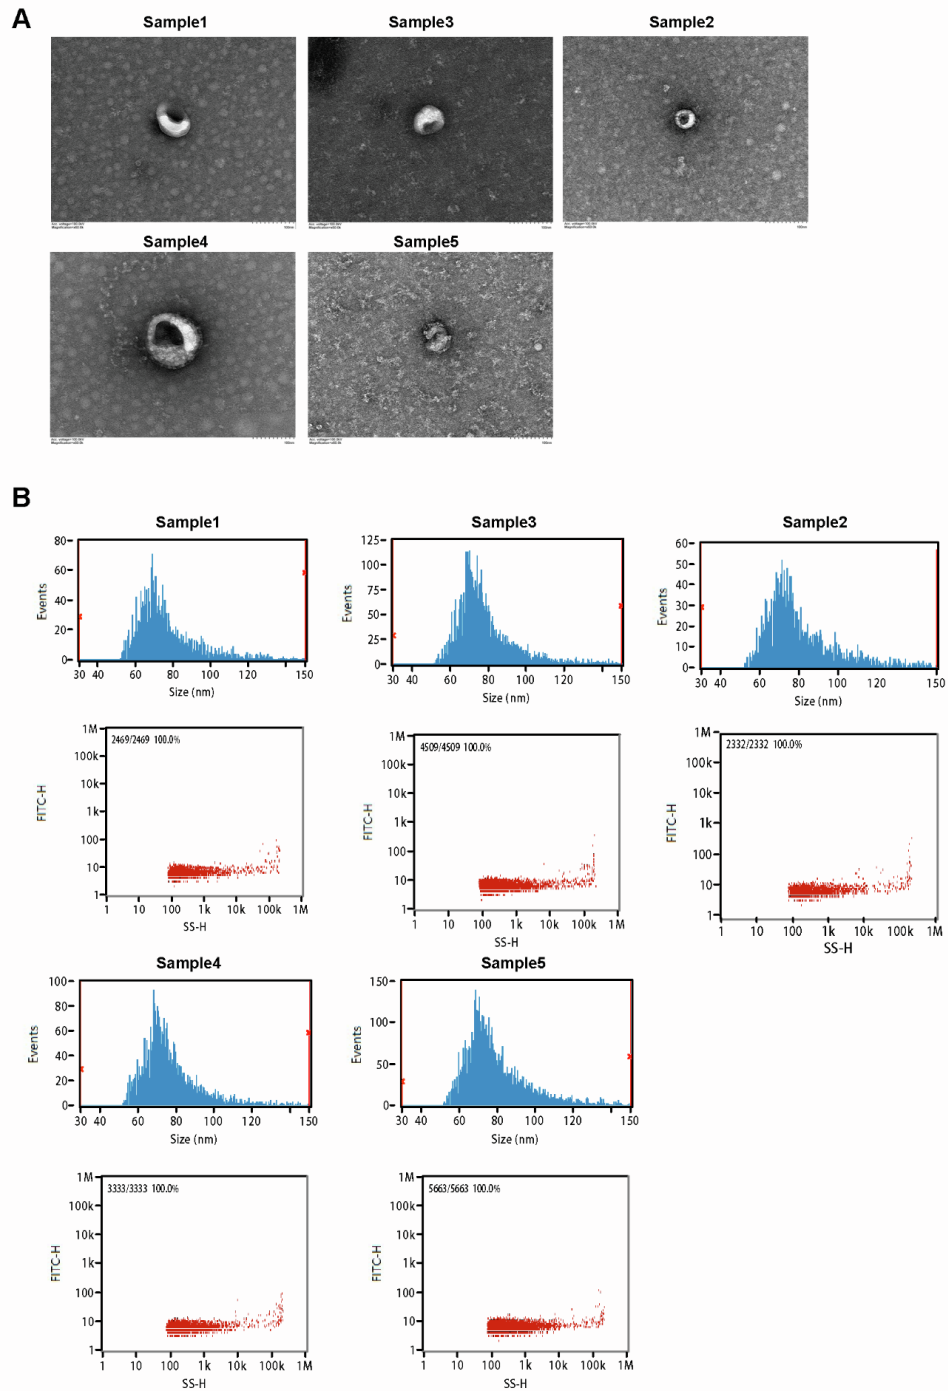



## Figure S1

(A) Representative plasma exosomes detected by transmission electron microscopy. (B) Size of plasma exosomes analyzed by high sensitivity flow cytometry.

**Fig. S2**

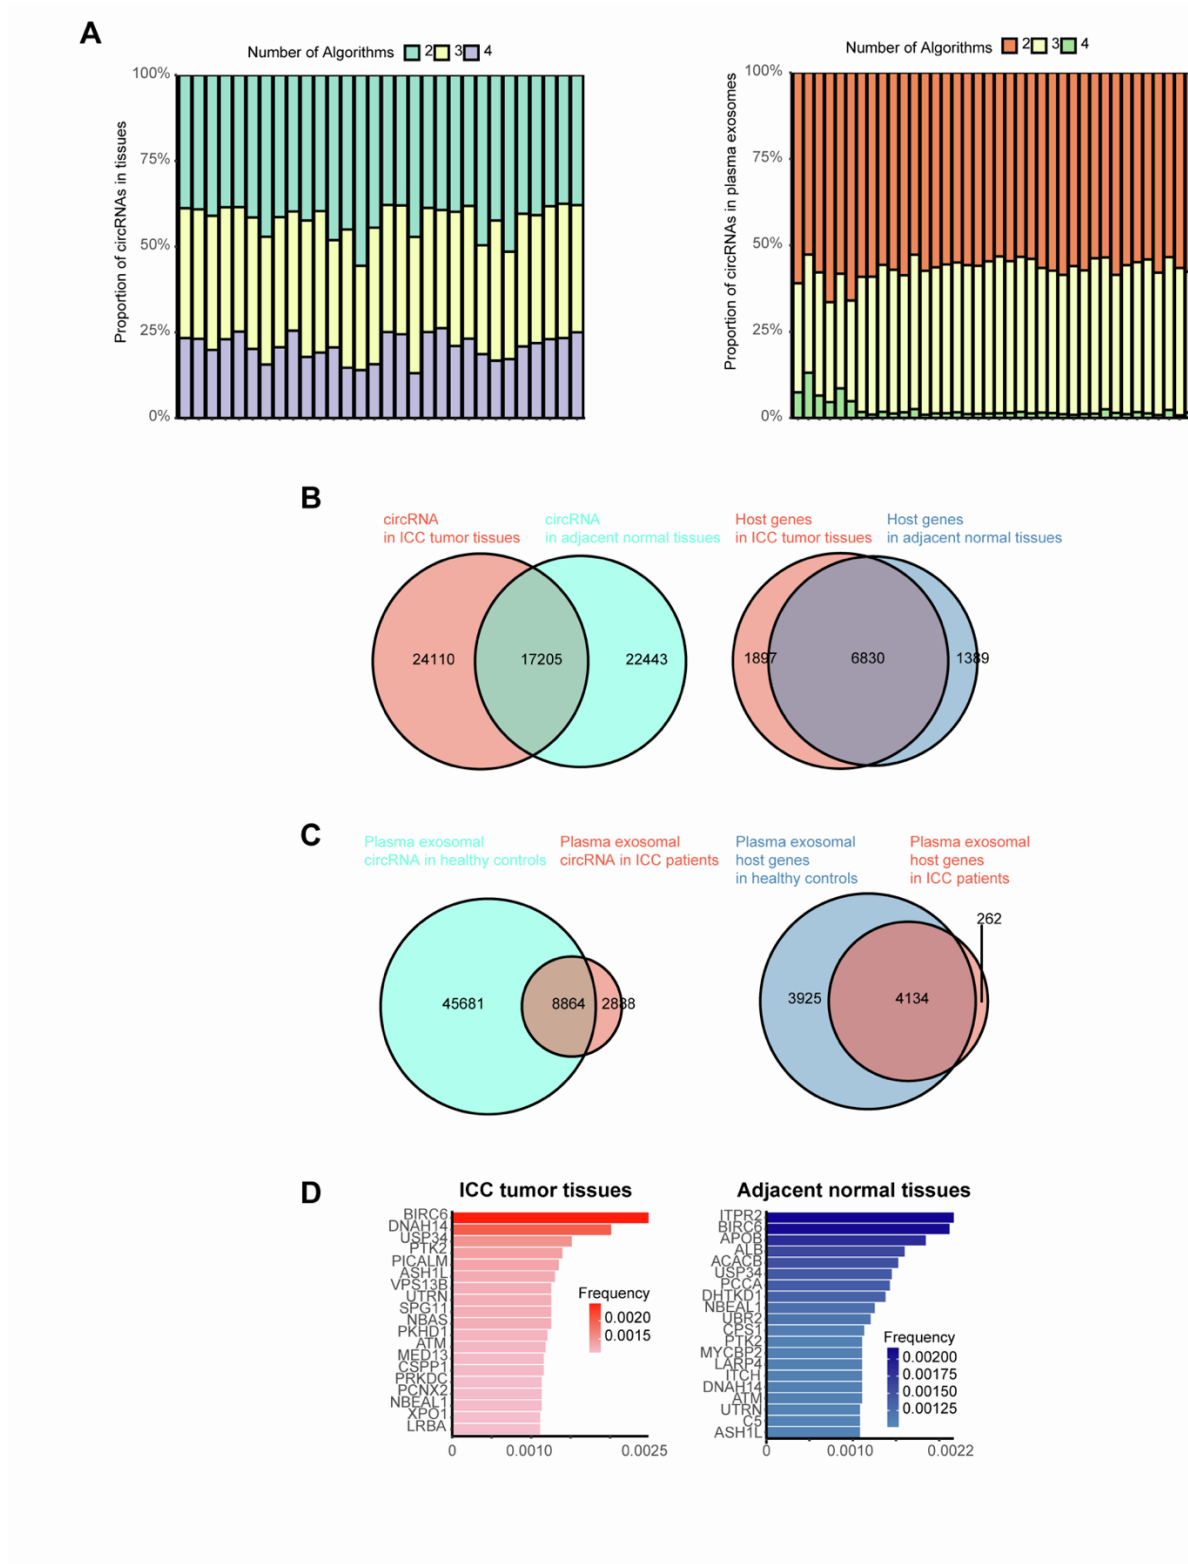

## Figure S2

(A) Proportion of circRNAs predicted by circRNA\_finder, find\_circ, Circexplorer, and CIRI2 in ICC tumor tissues and adjacent normal tissues (left panel), and plasma exosomes of patients with ICC and healthy controls (right panel). (B) Overlapping between circRNAs (left panel) and host genes (right panel) in ICC tumor tissues and adjacent normal tissues. (C) Overlapping between circRNAs (left panel) and host genes (right panel) in plasma exosomes of patients with ICC and healthy controls. (D) Top back spliced host genes in ICC tumor tissues and adjacent normal tissues.

**Fig. S3**

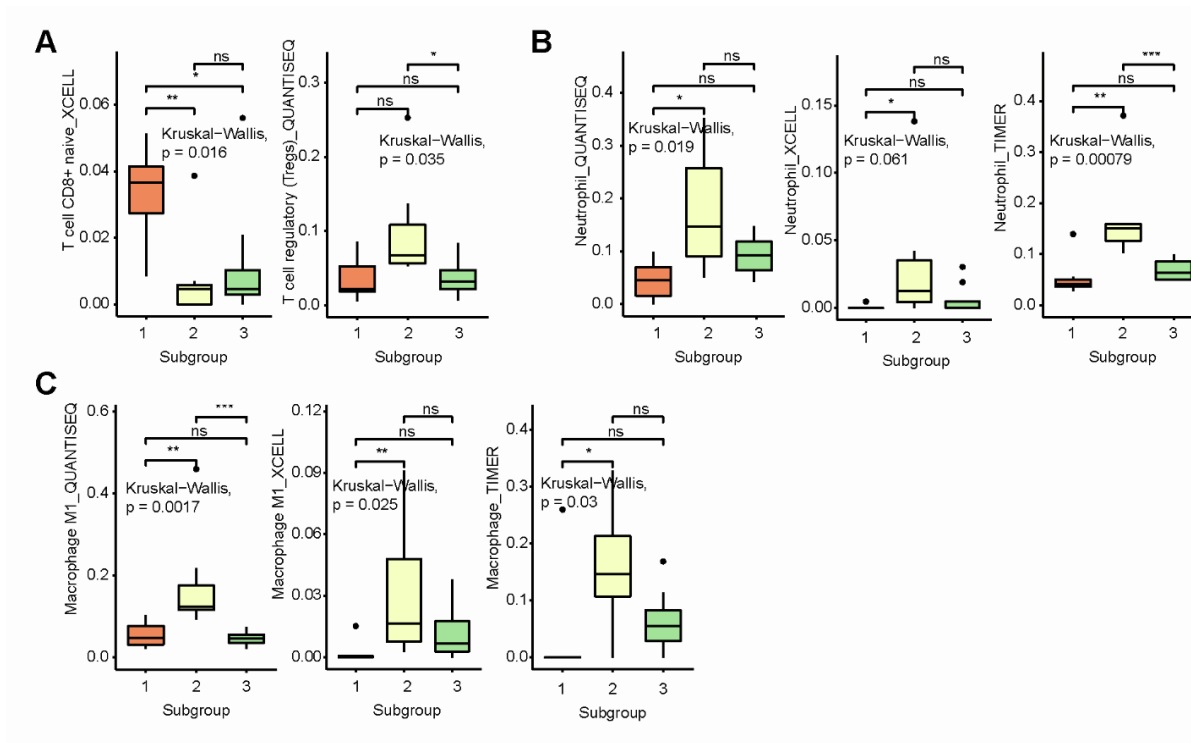

**Figure S3**

(A) Infiltration of CD8+ T cell and regulatory T cell in ICC subgroups. (B) Infiltration of neutrophil in ICC subgroups. (C) Infiltration of M1 macrophage in ICC subgroups.

**Fig. S4**

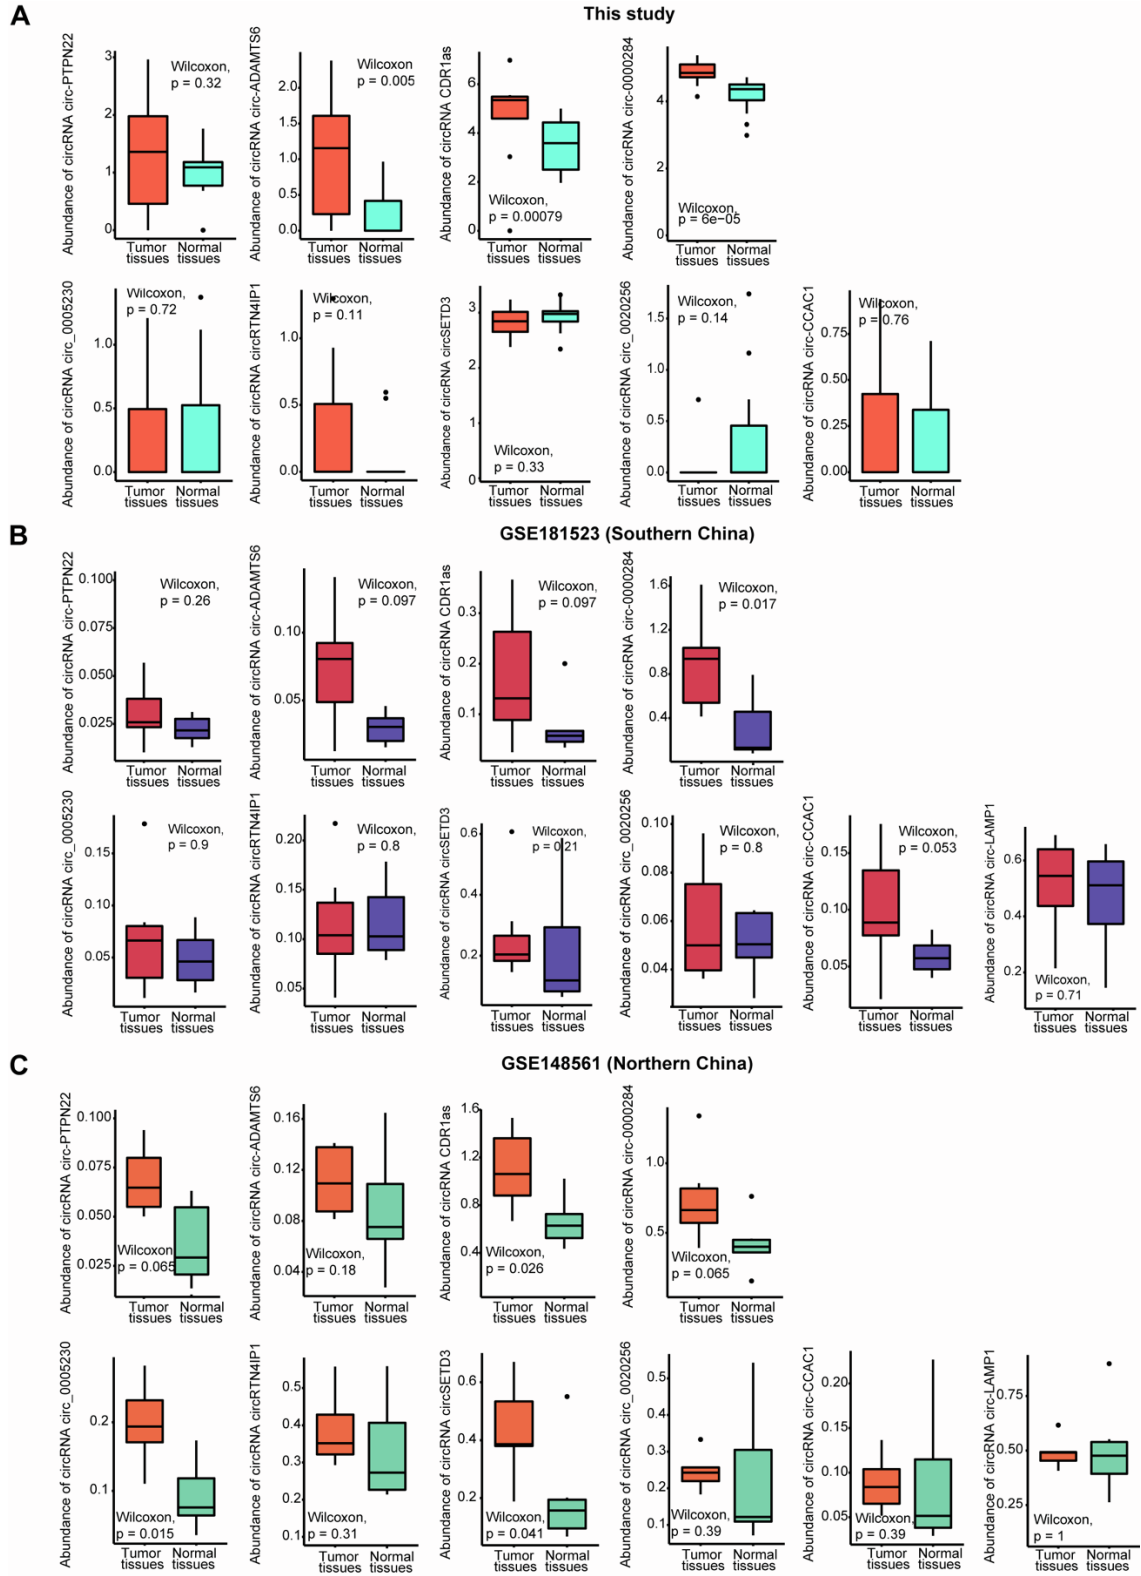

## Figure S4

Differential expression of circ-PTPN22, circ-ADAMTS6, and the circRNAs reported by recent publications in (A) This study; (B) GSE181523 (Southern China) and (C) GSE148561 (Northern China).

Fig. S5

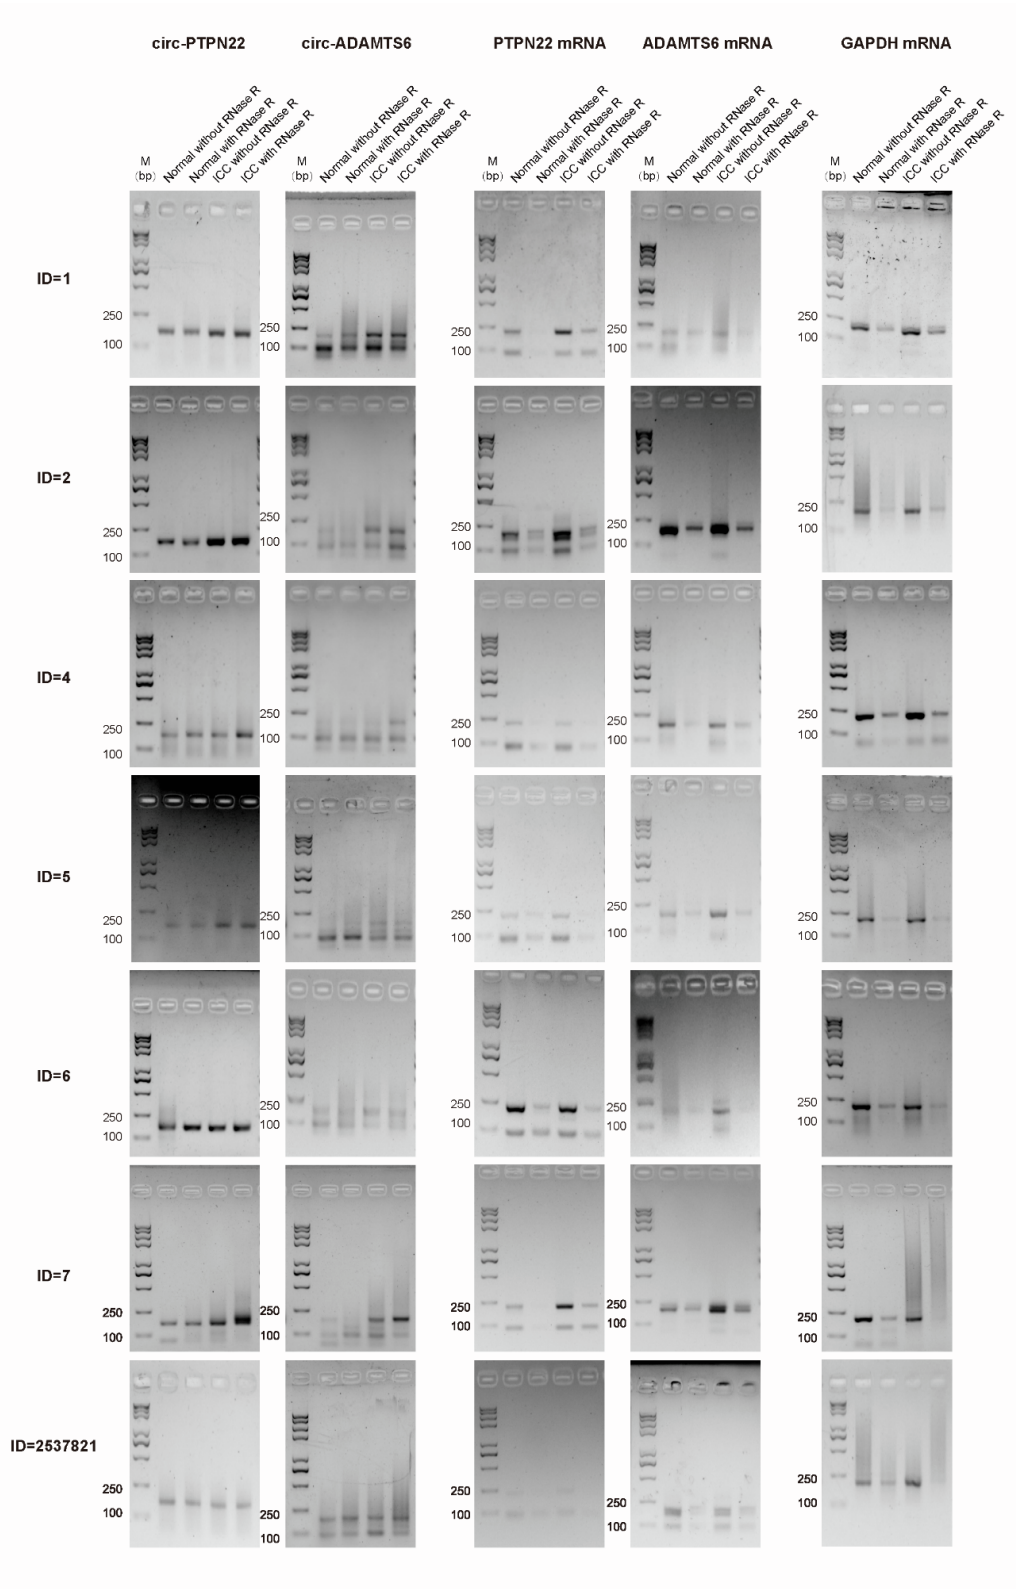

**Figure S5**

RT-qPCR of PTPN22 mRNA, ADAMTS6 mRNA, circ-PTPN22, and circ-ADAMTS6, analyzed by 2% agarose gel electrophoresis and stained with ExRed.



Fig. S6

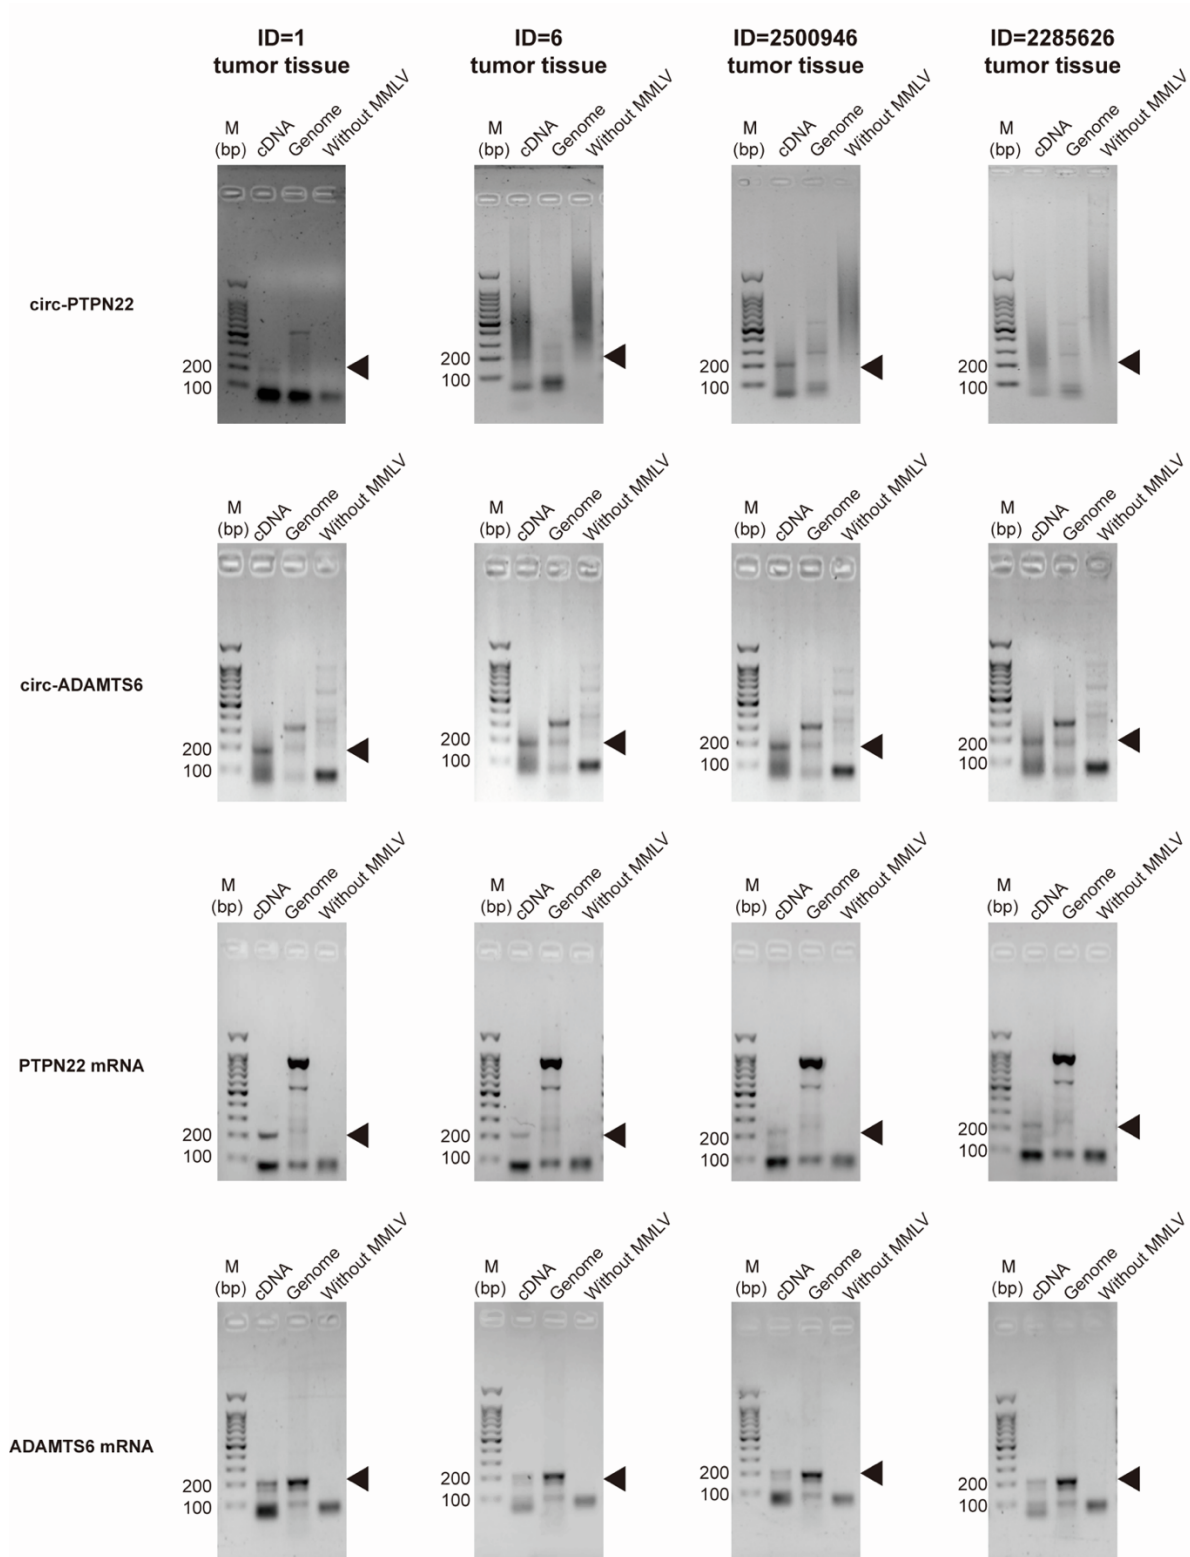

## Figure S6

PCR of PTPN22 mRNA, ADAMTS6 mRNA, circ-PTPN22, and circ-ADAMTS6 from the tumor tissues, analyzed by 2% agarose gel electrophoresis and stained with ExRed.

**Fig. S7**

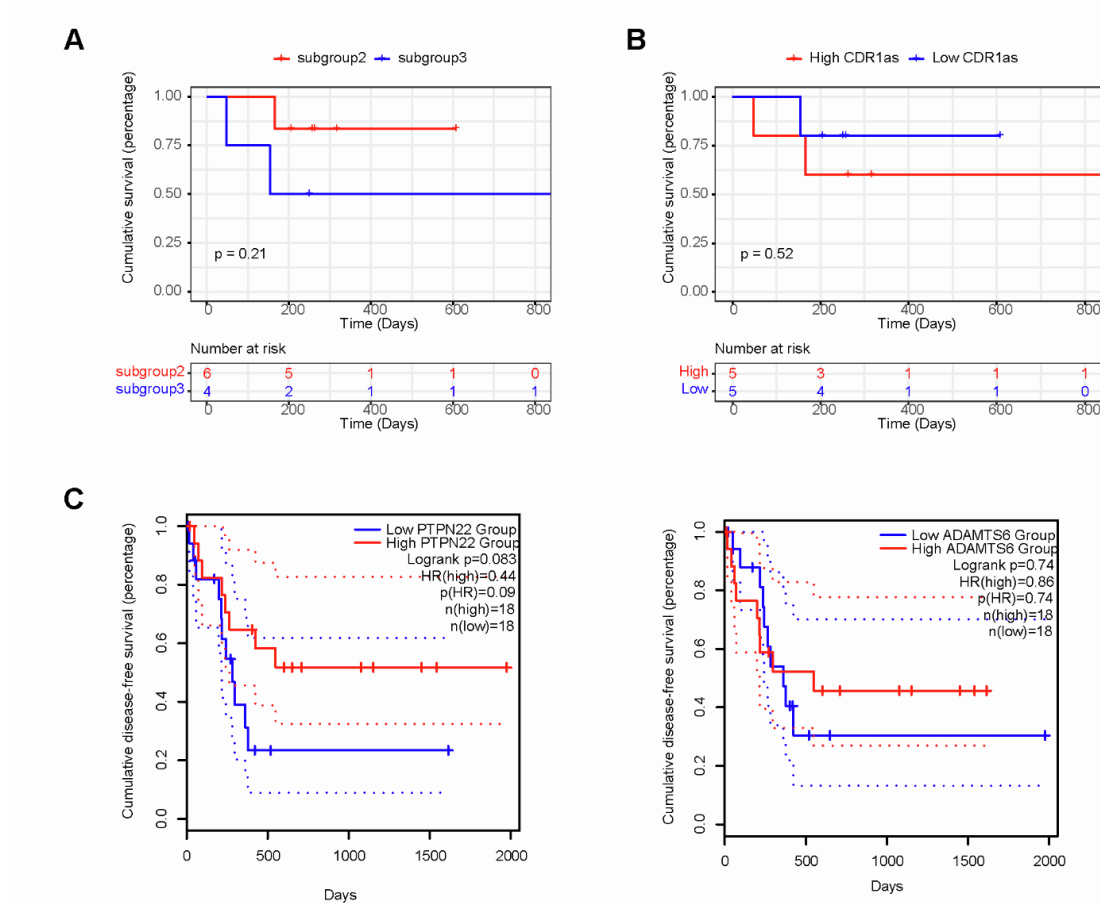

**Figure S7**

(A) Overall survival of patients with ICC in subgroup 2 (n=6) versus subgroup 3 (n=4). (B) Overall survival of patients whose ICC tumor tissues expressing high (n=5) versus low (n=5) levels of CDR1as. (C) Disease-free survival of TCGA-CHOL patients whose ICC tumor tissues expressing high (n=18) versus low (n=18) levels of PTPN22 and ADAMTS6, respectively.
